# Supplementary material
Source: PubMed Central journal article supplement (PMC3638944)
Supplement: NIHMS403213-supplement-Supp_Data.pdf [file NIHMS403213-supplement-Supp_Data.pdf]

## **Supplemental Information (SI)**

Involvement of Walk<sub>Spn</sub> (Vick) Phosphatase Activity in Setting WalR<sub>Spn</sub> (VicR)

Response Regulator Phosphorylation Level and Limiting Crosstalk in

*Streptococcus pneumoniae* D39 Cells

Kyle J. Wayne<sup>1</sup>, Shuo Li<sup>1</sup>, Krystyna M. Kazmierczak, Ho-Ching T. Tsui, and

Malcolm E. Winkler

Department of Biology, Indiana University Bloomington, 1001 East Third Street,

Bloomington, Indiana 47405

<sup>1</sup>Contributed equally to this work.

**Supplemental Experimental Procedures**

**Supplemental Tables S1-S3**

**Supplemental Figure Legends S1-S13**

## Supplemental Experimental Procedure

**Phos-tag SDS-PAGE and quantitative Western blotting.** The Phos-tag SDS-PAGE method was based on (Barbieri and Stock, 2008) with the following additions and modifications. ***Preparation of solutions and gels.*** Phos-tag acrylamide (AAL-107) was purchased from Wako Chemicals. Solutions were prepared according to the manufacturer's instructions ([http://www.phos-tag.com/english/shouh/pt\\_page\\_e\\_ver8.pdf](http://www.phos-tag.com/english/shouh/pt_page_e_ver8.pdf)). Trizma base (Sigma) was used to prepare buffers. Solution B (1.5 M Tris-HCl, 0.4% (wt/vol) SDS, pH 8.8) and solution C (0.50 M Tris-HCl, 0.4% (wt/vol) SDS, pH 6.8) were filter sterilized. Solution D (5 mM Phos-tag AAL solution containing 3% (vol/vol) methanol) was prepared using HPLC-grade methanol. Solution E (10 mM MnCl<sub>2</sub>) and solution F (10% (wt/vol) diammonium peroxydisulfate) were not filter sterilized. 2× Laemmli sample buffer (Bio-Rad #161-0737) was used instead of the manufacturer's recipe. Phos-tag gels were run in Tris-glycine-SDS running buffer (10× = 10 g SDS, 29 g Trizma base, 144 g glycine per L; no pH adjustment). The transfer buffer used for Western blotting contained 3 g Trizma base, 14.4 g glycine, and 20% (vol/vol) methanol per L. Commercial 40% acrylamide solution (Sigma, A9926) was used in place of the manufacturer's recipe.

A mini-protean gel system (Bio-Rad) with 1 mm spacers was used for these experiments. The 75 μM Phos-tag acrylamide resolving gel solution was prepared by mixing together 1.75 ml of 40% acrylamide, 1.75 ml of solution B, 105 μl of solution D, 105 μl of solution E, 3.29 ml of H<sub>2</sub>O, 75 μl of solution F, and 7.5 μl TEMED (Bio-Rad) in a 50 ml conical tube with light vortexing. 4.6 mls of

this solution was poured into the gel casting setup and overlaid with 1 ml of H<sub>2</sub>O. For each experiment, two gels were poured and used to run the samples or the heated controls of the samples (see below). After the resolving gel polymerized, a stacking gel was prepared by mixing 0.23 ml of 40% acrylamide, 0.5 ml of solution C, 1.15 ml of H<sub>2</sub>O, 35 µl of solution F, and 3.5 µl of TEMED. After removing the water overlay from the resolving gel, the stacking gel was poured on top of the resolving gel and the comb was added. Gels and running buffer were chilled to 4° in the electrophoresis apparatus 1 h prior to loading samples.

***Growth of strains and sample preparation.*** 5 ml overnight cultures were grown in BHI. After 12 to 16 h of overnight incubation, strains were diluted into 30 ml of pre-warmed BHI broth in 50 ml conical tubes to OD<sub>620</sub> ≈ 0.005. Because samples were collected at the same culture density, the starting OD<sub>620</sub> was varied in experiments that included slower growing strains (OD<sub>620</sub> ≈ 0.005 and OD<sub>620</sub> ≈ 0.0005 for slower- and faster-growing strains, respectively). Cultures were grown to OD<sub>620</sub> ≈ 0.2-0.3 and back-diluted in warm BHI, if they had grown slightly above this range. Bacteria were centrifuged at 14,500 × g for 5 min at 4°C in a chilled rotor, and all subsequent steps were performed at 4 °C. Supernates were decanted by pouring, and residual supernate was removed by pipetting to prevent carry-over of salts to Phos-tag SDS PAGE. Pellets were placed on ice and suspended in 1.0 ml of cold 20 mM Tris pH 7.0 (diluted from 1 M stock (Ambion)) and 8 µl of Protease Inhibitor Cocktail Set III, EDTA-free (Calbiochem) and transferred to chilled Lysing Matrix B tubes (MP Biomedicals), which were

secured in a 24 × 2 ml-tube adapter in a FastPrep-24 instrument (MP Biochemicals) stored at 4°C. Cells were disrupted by 3 consecutive runs of 40 sec each at a speed setting = 6.0 m/s. Lysed cell mixtures were placed on ice and microcentrifuged at 10,000 × *g* for 1 min at 4°C. 100 µl of supernate was transferred to a tube containing 100 µl of cold 2× Laemmli sample buffer (containing 5% (vol/vol) of freshly added β-mercaptoethanol) and vortexed lightly.

***Phos-tag SDS-PAGE, Western blotting, and detection.*** 30 µl of each sample was loaded per well of a chilled gel and electrophoresis was performed at 150 V for 2 h. After starting the sample run, remaining sample was heated at 95°C for 10 min. Heated samples were chilled on ice for 5 min and loaded onto the duplicate chilled gel and electrophoresed at 150 V for 2 h. Gels were soaked in 150 ml of chilled transfer buffer containing 1 mM EDTA for 15 min to remove Mn<sup>2+</sup> and then in 150 ml of chilled transfer buffer for 15 min to remove EDTA. Proteins were transferred to 0.45 µm nitrocellulose membranes (Bio-Rad) at 350 mA for 1 h in a wet-tank transfer apparatus (Bio-Rad).

Blocking, washing, and antibody incubation were done in 1X PBS, 0.01% (vol/vol) Tween. Blots were blocked in 5% (wt/vol) membrane blocking reagent (GE Healthcare) for 20 min at 25°C. Blots were washed twice briefly. Binding of a 1:1000 dilution of primary anti-WalR<sub>Spn</sub> antibody (Cocalico Biologicals; Ng *et al.*, 2003) was carried out for 1 h at 25°C, followed by 2 brief washes and an extended wash of 15 min. Binding of a 1:10,000 dilution of secondary HRP-conjugated anti-rabbit antibody (Amersham) was carried out for 1 h at 25°C, followed by 2 brief washes, an extended wash of 15 min, and 3 more washes of

5 min each. Signal detection was carried out using Amersham ECL detection reagents. After incubation with the detection solutions, luminescent signal was detected and quantitated using an IVIS imaging system (Xenogen) as described before (Wayne, *et al.*, 2010).

**Table S1.** Bacterial strains and plasmids used in this study<sup>a</sup>

| <b><i>S. pneumoniae</i> strains</b> |                                                                                                                                                                                                 |                                   |                                     |
|-------------------------------------|-------------------------------------------------------------------------------------------------------------------------------------------------------------------------------------------------|-----------------------------------|-------------------------------------|
| Strain number                       | Genotype (description)                                                                                                                                                                          | Antibiotic resistance             | Reference or source                 |
| EL59                                | R6 (unencapsulated laboratory strain R6 derived from intermediates of strain D39)                                                                                                               | None                              | A. Tomasz                           |
| EL1454                              | R6 <i>kan</i> -T1T2-P <sub>c</sub> - <i>pcsB</i> (EL59 transformed with <i>kan</i> -T1T2-P <sub>c</sub> - <i>pcsB</i> amplicon)                                                                 | Kan <sup>R</sup>                  | Ng <i>et al.</i> , 2003             |
| EL1472                              | R6 <i>walR</i> <> <i>ermAM kan</i> -T1T2-P <sub>c</sub> - <i>pcsB</i> (EL1454 transformed with <i>walR</i> <> <i>ermAM</i> amplicon)                                                            | Erm <sup>R</sup> Kan <sup>R</sup> | Ng <i>et al.</i> , 2003             |
| IU1690                              | D39 (Single colony isolate of serotype 2 strain encapsulated D39 NCTC 7466)                                                                                                                     | None                              | Lanie <i>et al.</i> , 2007          |
| IU1781                              | D39 <i>rpsL1</i><br>(IU1690 transformed with <i>pulA</i> - <i>rpsL1-rpsG-fusA</i> amplicon)                                                                                                     | Str <sup>R</sup>                  | Ramos-Montanez <i>et al.</i> , 2008 |
| IU1885                              | D39 <i>rpsL1 walk</i> ::[ <i>kan</i> <sup>R</sup> - <i>rpsL</i> <sup>+</sup> ]<br>(IU1781 transformed with <i>walk</i> ::[ <i>kan</i> <sup>R</sup> - <i>rpsL</i> <sup>+</sup> ] amplicon)       | Str <sup>S</sup> Kan <sup>R</sup> | Gutu <i>et al.</i> , 2010           |
| IU1896                              | D39 <i>rpsL1 Δwalk</i><br>(IU1885 transformed with $\Delta$ <i>walk</i> amplicon)                                                                                                               | Str <sup>R</sup>                  | Gutu <i>et al.</i> , 2010           |
| IU2306                              | D39 <i>rpsL1 Walk</i> <sup><math>\Delta</math>PAS</sup> [ $\Delta$ amino acids 104-198]<br>(IU1885 transformed with <i>Walk</i> <sup><math>\Delta</math>PAS</sup> [104-198] amplicon)           | Str <sup>R</sup>                  | Gutu <i>et al.</i> , 2010           |
| IU3102                              | D39 <i>rpsL1 walk</i> <sup>H218A</sup><br>(IU1885 transformed with <i>walk</i> <sup>H218A</sup> amplicon)                                                                                       | Str <sup>R</sup>                  | Gutu <i>et al.</i> , 2010           |
| IU3299                              | D39 <i>rpsL1 walk</i> <sup>+</sup> -FLAG<br>(IU1885 transformed with <i>walk</i> <sup>+</sup> -FLAG amplicon)                                                                                   | Str <sup>R</sup>                  | This study                          |
| IU3301                              | D39 <i>rpsL1 walk</i> <sup>H218A</sup> -FLAG<br>(IU1885 transformed with <i>walk</i> <sup>H218A</sup> -FLAG amplicon)                                                                           | Str <sup>R</sup>                  | This study                          |
| IU3307                              | D39 <i>rpsL1 Walk</i> <sup><math>\Delta</math>PAS</sup> [ $\Delta$ amino acids 104-198]-FLAG<br>(IU1885 transformed with <i>Walk</i> <sup><math>\Delta</math>PAS</sup> [104-198]-FLAG amplicon) | Str <sup>R</sup>                  | This study                          |
| IU3483                              | D39 <i>rpsL1 ΔpnpR</i> ::P- <i>ermB</i><br>(IU1781 transformed with $\Delta$ <i>pnpR</i> ::P- <i>ermB</i> amplicon)                                                                             | Str <sup>R</sup> Erm <sup>R</sup> | This study                          |

| IU4086                        | D39 <i>rpsL1</i> $\Delta$ <i>pnpRS::P<sub>c</sub>-erm</i><br>(IU1781 transformed with<br>$\Delta$ <i>pnpRS::P<sub>c</sub>-erm</i> amplicon)                                                                                                  | Str <sup>R</sup> Erm <sup>R</sup>  | This study                |
|-------------------------------|----------------------------------------------------------------------------------------------------------------------------------------------------------------------------------------------------------------------------------------------|------------------------------------|---------------------------|
| IU5352                        | D39 <i>rpsL1</i> $\Delta$ <i>walk bgaA::P<sub>c</sub>-cat</i><br>T1T2-P <sub><i>fcsK</i></sub> - <i>walk</i> <sup>+</sup><br>(IU1896 transformed with<br><i>bgaA::P<sub>c</sub>-cat-T1T2-P<sub>fcsK</sub>-walk</i> <sup>+</sup><br>amplicon) | Str <sup>R</sup> Cm <sup>R</sup>   | This study                |
| IU5401                        | D39 <i>rpsL1 walk</i> <sup>T222A</sup><br>(IU1885 transformed with<br><i>walk</i> <sup>T222A</sup> amplicon)                                                                                                                                 | Str <sup>R</sup>                   | This study                |
| IU5720                        | D39 <i>rpsL1</i> $\Delta$ <i>walk</i> $\Delta$ <i>pnpR::P-ermB</i><br>(IU1896 transformed with<br>$\Delta$ <i>pnpR::P-ermB</i> amplicon)                                                                                                     | Str <sup>R</sup> Erm <sup>R</sup>  | This study                |
| IU5728                        | D39 <i>rpsL1</i> $\Delta$ <i>walk</i> $\Delta$ <i>pnpRS::P<sub>c</sub>-erm</i><br>(IU1896 transformed with<br>$\Delta$ <i>pnpRS::P<sub>c</sub>-erm</i> amplicon)                                                                             | Str <sup>R</sup> Erm <sup>R</sup>  | This study                |
| <b><i>E. coli</i> strains</b> |                                                                                                                                                                                                                                              |                                    |                           |
| Strain Number                 | Genotype (plasmid) <sup>b</sup>                                                                                                                                                                                                              | Antibiotic resistance <sup>a</sup> | Reference or source       |
| EL27                          | BL21(DE3) pLysS (pSP001)                                                                                                                                                                                                                     | Amp <sup>R</sup> Cm <sup>R</sup>   | Ng <i>et al.</i> , 2005   |
| IU2046                        | DH5 $\alpha$ (pIU136)                                                                                                                                                                                                                        | Kan <sup>R</sup>                   | Gutu <i>et al.</i> , 2010 |
| IU2092                        | BL21(DE3) pLysS (pIU140)                                                                                                                                                                                                                     | Kan <sup>R</sup> Cm <sup>R</sup>   | Gutu <i>et al.</i> , 2010 |
| IU3419                        | Rosetta BL21(DE3) pLysS<br>(pIU224)                                                                                                                                                                                                          | Kan <sup>R</sup> Cm <sup>R</sup>   | This study                |
| IU3423                        | Rosetta BL21(DE3) pLysS<br>(pIU229)                                                                                                                                                                                                          | Kan <sup>R</sup> Cm <sup>R</sup>   | This study                |
| IU3435                        | Rosetta BL21(DE3) pLysS<br>(pIU241)                                                                                                                                                                                                          | Kan <sup>R</sup> Cm <sup>R</sup>   | This study                |
| IU3456                        | Rosetta BL21(DE3) pLysS<br>(pIU225)                                                                                                                                                                                                          | Kan <sup>R</sup> Cm <sup>R</sup>   | This study                |
| IU3464                        | Rosetta BL21(DE3) pLysS<br>(pIU233)                                                                                                                                                                                                          | Kan <sup>R</sup> Cm <sup>R</sup>   | This study                |
| IU4105                        | Rosetta BL21(DE3) pLysS<br>(pIU253)                                                                                                                                                                                                          | Kan <sup>R</sup> Cm <sup>R</sup>   | This study                |
| IU4266                        | Tuner (pIU255)                                                                                                                                                                                                                               | Kan <sup>R</sup>                   | This study                |
| IU4727                        | Rosetta 2(DE3) (pIU262)                                                                                                                                                                                                                      | Kan <sup>R</sup> Cm <sup>R</sup>   | This study                |
| IU4730                        | Rosetta 2(DE3) (pIU263)                                                                                                                                                                                                                      | Kan <sup>R</sup> Cm <sup>R</sup>   | This study                |
| IU4733                        | Rosetta 2(DE3) (pIU265)                                                                                                                                                                                                                      | Kan <sup>R</sup> Cm <sup>R</sup>   | This study                |
| IU4821                        | Rosetta 2(DE3) (pIU264)                                                                                                                                                                                                                      | Kan <sup>R</sup> Cm <sup>R</sup>   | This study                |
| IU4825                        | Rosetta 2(DE3) (pIU268)                                                                                                                                                                                                                      | Kan <sup>R</sup> Cm <sup>R</sup>   | This study                |
| IU4848                        | Rosetta 2(DE3) (pIU266)                                                                                                                                                                                                                      | Kan <sup>R</sup> Cm <sup>R</sup>   | This study                |
| IU4851                        | Rosetta 2(DE3) (pIU267)                                                                                                                                                                                                                      | Kan <sup>R</sup> Cm <sup>R</sup>   | This study                |
| IU5019                        | Rosetta 2(DE3) (pIU269)                                                                                                                                                                                                                      | Kan <sup>R</sup> Cm <sup>R</sup>   | This study                |
| IU5022                        | Rosetta 2(DE3) (pIU270)                                                                                                                                                                                                                      | Kan <sup>R</sup> Cm <sup>R</sup>   | This study                |

|                 |                                              |                                  |            |
|-----------------|----------------------------------------------|----------------------------------|------------|
| IU5025          | Rosetta 2(DE3) (pIU271)                      | Kan <sup>R</sup> Cm <sup>R</sup> | This study |
| IU5028          | Rosetta 2(DE3) (pIU274)                      | Kan <sup>R</sup> Cm <sup>R</sup> | This study |
| IU5031          | Rosetta 2(DE3) (pIU276)                      | Kan <sup>R</sup> Cm <sup>R</sup> | This study |
| IU5109          | Rosetta 2(DE3) (pIU272)                      | Kan <sup>R</sup> Cm <sup>R</sup> | This study |
| IU5112          | Rosetta 2(DE3) (pIU273)                      | Kan <sup>R</sup> Cm <sup>R</sup> | This study |
| IU5153          | Rosetta 2(DE3) (pIU275)                      | Kan <sup>R</sup> Cm <sup>R</sup> | This study |
| IU5156          | Rosetta 2(DE3) (pIU277)                      | Kan <sup>R</sup> Cm <sup>R</sup> | This study |
| IU5207          | Rosetta 2(DE3) (pIU279)                      | Kan <sup>R</sup> Cm <sup>R</sup> | This study |
| <b>Plasmids</b> |                                              |                                  |            |
| Plasmid         | Description <sup>c</sup>                     | Reference or source              |            |
| pSP001          | pET16b (WalR)                                | Ng <i>et al.</i> , 2005          |            |
| pIU136          | pSumo                                        | Gutu <i>et al.</i> , 2010        |            |
| pIU140          | pSumo ( $\Delta$ N35-WalK)                   | Gutu <i>et al.</i> , 2010        |            |
| pIU224          | pSumo ( $\Delta$ N210-CiaH)                  | This study                       |            |
| pIU225          | pSumo ( $\Delta$ N165-HK06)                  | This study                       |            |
| pIU229          | pSumo ( $\Delta$ N58-HK08)                   | This study                       |            |
| pIU233          | pSumo ( $\Delta$ N164-VncS)                  | This study                       |            |
| pIU241          | pSumo ( $\Delta$ N206-PnpS)                  | This study                       |            |
| pIU253          | pSumo (VncR)                                 | This study                       |            |
| pIU255          | pSumo ( $\Delta$ N40-PnpS)                   | This study                       |            |
| pIU262          | pSumo ( $\Delta$ N35-WalK <sup>V216G</sup> ) | This study                       |            |
| pIU263          | pSumo ( $\Delta$ N35-WalK <sup>S217D</sup> ) | This study                       |            |
| pIU264          | pSumo ( $\Delta$ N35-WalK <sup>S217A</sup> ) | This study                       |            |
| pIU265          | pSumo ( $\Delta$ N35-WalK <sup>R221A</sup> ) | This study                       |            |
| pIU266          | pSumo ( $\Delta$ N35-WalK <sup>P223S</sup> ) | This study                       |            |
| pIU267          | pSumo ( $\Delta$ N35-WalK <sup>P223A</sup> ) | This study                       |            |
| pIU268          | pSumo ( $\Delta$ N35-WalK <sup>I225A</sup> ) | This study                       |            |
| pIU269          | pSumo ( $\Delta$ N35-WalK <sup>R221K</sup> ) | This study                       |            |
| pIU270          | pSumo ( $\Delta$ N35-WalK <sup>R221D</sup> ) | This study                       |            |
| pIU271          | pSumo ( $\Delta$ N35-WalK <sup>R221S</sup> ) | This study                       |            |
| pIU272          | pSumo ( $\Delta$ N35-WalK <sup>I222A</sup> ) | This study                       |            |
| pIU273          | pSumo ( $\Delta$ N35-WalK <sup>I222Y</sup> ) | This study                       |            |
| pIU274          | pSumo ( $\Delta$ N35-WalK <sup>I222D</sup> ) | This study                       |            |
| pIU275          | pSumo ( $\Delta$ N130-PnpS)                  | This study                       |            |
| pIU276          | pSumo ( $\Delta$ N150-PnpS)                  | This study                       |            |
| pIU277          | pSumo ( $\Delta$ N170-PnpS)                  | This study                       |            |
| pIU279          | pSumo (RR06)                                 | This study                       |            |

<sup>a</sup>Strains and plasmids were constructed as described in Experimental procedures.

Antibiotic resistance markers: Kan<sup>R</sup>, kanamycin; Str<sup>R</sup>, streptomycin, Erm<sup>R</sup>, erythromycin; Amp<sup>R</sup>, ampicillin; Cm<sup>R</sup>, chloramphenicol. Concentrations of antibiotics used for *S. pneumoniae* strains: 250  $\mu$ g Str per mL, 250  $\mu$ g Kan per mL, 0.3  $\mu$ g Erm per mL, and



2.5 µg Cm per mL; for *E. coli* strains: 34 µg Cm per mL, 30 µg Kan per mL, and 100 µg Amp per mL. All antibiotics were purchased from Sigma-Aldrich.

<sup>b</sup>Rosetta 2(DE3), DH5α, and Tuner cells were purchased as competent cells from Novagen, Bionline, and EMD, respectively.

<sup>c</sup>pSumo plasmid (LifeSensors, Inc.) was used to fuse an N-terminal Sumo tag (≈12 kDa) to Walk constructs. “ΔN” indicates the deletion of the indicated number of amino acids from the N-terminus of the protein. Amino acid replacements are indicated as superscripts.

**Table S2.** Primers used in this study

| <b><i>S. pneumoniae</i> strains</b>                                         |                                                        |                                                                                                                                                      |
|-----------------------------------------------------------------------------|--------------------------------------------------------|------------------------------------------------------------------------------------------------------------------------------------------------------|
| <b>Construction of <i>walk</i><sup>+</sup>-FLAG amplicon (IU3299)</b>       |                                                        |                                                                                                                                                      |
| Primer                                                                      | Sequence (5' to 3')                                    | Product                                                                                                                                              |
| SR19                                                                        | GTAGATGATGAGAAACCAATCTCGG                              | This amplicon was amplified from wild-type DNA. A single FLAG epitope was introduced into the junction site in primer KW130.                         |
| KW130                                                                       | TCACTCATTCTATTTATCATCATCATCTTTATAAT<br>CGTCTTCTACTTCAT |                                                                                                                                                      |
| SR24                                                                        | CTATATCTCTGTCAATGGTGTTCGG                              | This amplicon was amplified from wild-type DNA. A single FLAG epitope was introduced into the junction site in primer KW131.                         |
| KW131                                                                       | ATGAAGTAGAAGACGATTATAAAGATGATGATGA<br>TAAATAGAATGAGTGA |                                                                                                                                                      |
| <b>Construction of <i>walk</i><sup>His218A</sup>-FLAG amplicon (IU3301)</b> |                                                        |                                                                                                                                                      |
| Primer                                                                      | Sequence (5' to 3')                                    | Product                                                                                                                                              |
| SR19                                                                        | GTAGATGATGAGAAACCAATCTCGG                              | This amplicon was amplified from DNA containing the His218Ala mutation. A single FLAG epitope was introduced into the junction site in primer KW130. |
| KW130                                                                       | TCACTCATTCTATTTATCATCATCATCTTTATAAT<br>CGTCTTCTACTTCAT |                                                                                                                                                      |
| SR24                                                                        | CTATATCTCTGTCAATGGTGTTCGG                              | This amplicon was amplified from DNA containing the His218Ala mutation. A single FLAG was introduced into the junction site in primer KW131.         |
| KW131                                                                       | ATGAAGTAGAAGACGATTATAAAGATGATGATGA<br>TAAATAGAATGAGTGA |                                                                                                                                                      |

| <b>Construction of Walk<sup>ΔPAS</sup> [Δ amino acids 104-198]-FLAG amplicon (IU3307)</b> |                                                                    |                                                                                                                                                 |
|-------------------------------------------------------------------------------------------|--------------------------------------------------------------------|-------------------------------------------------------------------------------------------------------------------------------------------------|
| Primer                                                                                    | Sequence (5' to 3')                                                | Product                                                                                                                                         |
| SR19                                                                                      | GTAGATGATGAGAAACCAATCTCGG                                          | This amplicon was amplified from DNA containing the ΔPAS mutation. A single FLAG epitope was introduced into the junction site in primer KW130. |
| KW130                                                                                     | TCACTCATTCTATTTATCATCATCATCTTTATAAT<br>CGTCTTCTACTTCAT             |                                                                                                                                                 |
| SR24                                                                                      | CTATATCTCTGTCAATGGTGTTCGGG                                         | This amplicon was amplified from DNA containing the ΔPAS mutation. A single FLAG epitope was introduced into the junction site in primer KW131. |
| KW131                                                                                     | ATGAAGTAGAAGACGATTATAAAGATGATGATGA<br>TAAATAGAATGAGTGA             |                                                                                                                                                 |
| <b>Construction of Δ<i>pnpR</i>::P-<i>ermB</i> amplicon (IU3483, IU5720)</b>              |                                                                    |                                                                                                                                                 |
| Primer                                                                                    | Sequence (5' to 3')                                                | Product                                                                                                                                         |
| PS351                                                                                     | GGTAAGGGAAGGGCGCTTTATA                                             | Upstream sequence and 5' 171 bp of <i>pnpR</i> coding sequence                                                                                  |
| PS343                                                                                     | TTTCATAACTTCTTGGTAACATGATATCAAGC                                   |                                                                                                                                                 |
| PS345                                                                                     | GCTTGATATCATGTTACCAAGAAGTTATGGAAA                                  | P- <i>ermB</i> cassette containing <i>ermB</i> coding sequence and flanking upstream and downstream sequences                                   |
| PS347                                                                                     | GTCATGTTGGGATGTTTCTTAGCTCCTTGGAAGC                                 |                                                                                                                                                 |
| PS349                                                                                     | GCTTCCAAGGAGCTAAGAAACATCCCAACATGA<br>C                             | 3' 190 bp of <i>pnpR</i> coding sequence and downstream sequence                                                                                |
| PS350                                                                                     | GGCCAAGACCAGTGCCACCA                                               |                                                                                                                                                 |
| <b>Construction of Δ<i>pnpRS</i>::P<sub>c</sub>-<i>erm</i> amplicon (IU4086)</b>          |                                                                    |                                                                                                                                                 |
| Primer                                                                                    | Sequence (5' to 3')                                                | Product                                                                                                                                         |
| KW132                                                                                     | TACTTGAGGATATATCTTCATGAGCCCTTGATAA<br>CCACTGTCAGCCAAG              | Region upstream of <i>pnpR</i> , 60 bp remaining of <i>pnpR</i> /P <sub>c</sub> - <i>erm</i> junction                                           |
| KW154                                                                                     | AGATACAAATCAAACAAATTTTGGGCCCGGGTA<br>GTCAAGCAATTTTCAGAAATGTGTTCTTC |                                                                                                                                                 |

|                                                                                                |                                                                 |                                                                                                                                                                                |
|------------------------------------------------------------------------------------------------|-----------------------------------------------------------------|--------------------------------------------------------------------------------------------------------------------------------------------------------------------------------|
| KW155                                                                                          | GAAGAACACATTCTGAAATTGCTTGACTACCCGG<br>GCCCAAATTTGTTTGATTTGTATCT | Remaining <i>pnpR</i> ,<br>P <sub>c</sub> - <i>erm</i> junction,<br>P <sub>c</sub> - <i>erm</i> , P <sub>c</sub> - <i>erm</i> 60<br>bp remaining of 3'<br><i>pnpS</i> junction |
| KW156                                                                                          | TCGTGAAGCAACTGCCTCTGCCAAGTTATTTCT<br>CCCGTTAAATAATAGATAACT      |                                                                                                                                                                                |
| KW157                                                                                          | AGTTATCTATTATTTAACGGGAGGAAATAACTTG<br>GCAGAGGCAGTTGCTTCACGA     | P <sub>c</sub> - <i>erm</i> 60 bp<br>remaining of 3'<br><i>pnpS</i> junction,<br>region<br>downstream of<br><i>pnpS</i>                                                        |
| KW137                                                                                          | GCTTCAATAAATTTATTATCTGTGACCACTTGTTG<br>ACCTTGTTTGGAGTG          |                                                                                                                                                                                |
| <b>Construction of <i>bgaA</i>::P<sub>fcSK</sub>-<i>walk</i><sup>+</sup> amplicon (IU5352)</b> |                                                                 |                                                                                                                                                                                |
| 20F32                                                                                          | ATGGTTGTCTCTTGTTTGACTGCCG                                       | ' <i>bgaA</i> sequence                                                                                                                                                         |
| KK609                                                                                          | GCCCCGTTAGTTATTTGCTTTTGCTGCGTACTC                               |                                                                                                                                                                                |
| KK610                                                                                          | AGCAAATAACTAACGGGGCAGGTTAGTGACA                                 | P <sub>c</sub> - <i>cat</i> -terminator<br>cassette                                                                                                                            |
| KK503                                                                                          | GTTTTATTTGATGCCGATAAGCTTGATGAAAATTT<br>GTTTG                    |                                                                                                                                                                                |
| KK504                                                                                          | CAAGCTTATCGGCATCAAATAAAACGAAAGGCTC                              | T1T2-P <sub>fcSK</sub>                                                                                                                                                         |
| KW119                                                                                          | TGGTTTGTTCAGTAAATCAAGCATTTTCTTCTC<br>TCTTCGTCCTTGATT            |                                                                                                                                                                                |
| KW120                                                                                          | AATCAAGGACGAAGAGAGAAGAAAAATGCTTGA<br>TTTACTGAAACAAACCA          | <i>walk</i>                                                                                                                                                                    |
| KK608                                                                                          | TCGCCCAATTGGAGCGATATTTTAGTCTTCTA<br>CTTCATCCTCCCATAC            |                                                                                                                                                                                |
| KK607                                                                                          | CTCCAATTGGGGCGATATTTGGGATACCTTCTT<br>TATCATTAAGACCAAAG          | downstream<br>sequence                                                                                                                                                         |
| 20R45                                                                                          | CCTCCCCTTCTGATTAATATGCC                                         |                                                                                                                                                                                |
| <b>Construction of <i>walk</i><sup>1222A</sup> amplicon (IU5401)</b>                           |                                                                 |                                                                                                                                                                                |
| Primer                                                                                         | Sequence (5' to 3') <sup>a</sup>                                | Product                                                                                                                                                                        |
| 39R19                                                                                          | TGATAACTTTTCGCAAGAAGAGCAG                                       | Upstream<br>sequence and 5'<br>675 bp of <i>walk</i><br>coding sequence<br>containing<br>Thr222Ala (ACT<br>to GCT)<br>substitution.                                            |
| KK612                                                                                          | AGTCAGAGGAGCCCGTAACTCATGGCTAAC                                  |                                                                                                                                                                                |
| KK613                                                                                          | TGAGTTACGGGCTCCTCTGACTAGCGTAAAATC                               | 3' 697 bp of <i>walk</i><br>coding sequence<br>containing<br>Thr222Ala (ACT<br>to GCT)<br>substitution and<br>downstream<br>sequence.                                          |
| 39F14                                                                                          | GTCATCAGCAACCTCTTATATTGTAAGC                                    |                                                                                                                                                                                |

| <b>Construction of <math>\Delta pnpRS::P_c</math>-erm amplicon (IU5728)</b> |                                                                    |                                                                                                                          |
|-----------------------------------------------------------------------------|--------------------------------------------------------------------|--------------------------------------------------------------------------------------------------------------------------|
| Primer                                                                      | Sequence (5' to 3')                                                | Product                                                                                                                  |
| KW132                                                                       | TACTTGAGGATATATCTTCATGAGCCCTTGATAA<br>CCTACTGTCAGCCAAG             | Region upstream<br>of <i>pnpR</i> , 60 bp<br>remaining of<br><i>pnpR/erm</i><br>junction                                 |
| KW133                                                                       | GAGAATATTTTATATTTTGTTCATAAAGCCTTCC<br>TACTTAAATGGTAG               |                                                                                                                          |
| KW134                                                                       | CTACCATTTAAGTAAGGAAGGCTTTATGAACAAA<br>AATATAAAATATTCTC             | Remaining<br><i>pnpR/erm</i><br>junction, <i>ermAM</i> ,<br><i>erm</i> /60 bp<br>remaining of 3'<br><i>pnpS</i> junction |
| KW135                                                                       | CAAGCTGACTTGTCACCGTGACTTGAGCATTATT<br>TCTCATTTTCCTCCCG             |                                                                                                                          |
| KW136                                                                       | CGGGAGGAAAATGAGAAATAATGCTCAAGTCAC<br>GGTGACAAGTCAGCTTG             | <i>erm</i> 60 bp<br>remaining of 3'<br><i>pnpS</i> junction,<br>region<br>downstream of<br><i>pnpS</i>                   |
| KW137                                                                       | GCTTCAATAAATTTATTATCTGTGACCACTTGTTG<br>ACCTTGTTTGGAGTG             |                                                                                                                          |
| <b>Primers used in construction of plasmid inserts</b>                      |                                                                    |                                                                                                                          |
| Primer                                                                      | Sequence (5' to 3')                                                | Amplicon Product                                                                                                         |
| AG110                                                                       | AACTGGGACAAGGAGATATAGGTCTTGAGAGTA<br>TGCA                          | $\Delta$ N210-CiaH<br>for pIU224                                                                                         |
| AG111                                                                       | AGTAGGATCCTTATTTTTTCTTTTTAGATGGTGTC                                |                                                                                                                          |
| AG122                                                                       | AACTGGGACAAGGAGATATAGGTGCTTGCTCA<br>ATCC                           | $\Delta$ N165-HK06<br>for pIU225                                                                                         |
| AG123                                                                       | AGTAGGATCCTTACAAGCTAATCTTAAATTCCAT<br>ACCG                         |                                                                                                                          |
| AG126                                                                       | AACTGGTCTCAAGGTTTGCCAGTCTTTACGT<br>AGTAGGATCCTTAGGCTTTATTTTCACTACC | $\Delta$ N58-HK08<br>for pIU229                                                                                          |
| AG127                                                                       |                                                                    |                                                                                                                          |
| AG116                                                                       | AACTGGGACAAGGAGATATAGGTACTATTGTTG<br>CACCGA                        | $\Delta$ N164-VncS<br>for pIU233                                                                                         |
| AG117                                                                       | AGTAGGATCCTTAGTCTTGGACGACTTTTGGG                                   |                                                                                                                          |
| AG134                                                                       | AACTGGTCTCAAGGTGATTTAACAACGATTAG                                   | $\Delta$ N206-PnpS<br>for pIU241                                                                                         |
| AG115                                                                       | AGTAGGATCCTTAGTCCTGTGCGAAAGATTGG                                   |                                                                                                                          |
| AG102                                                                       | AACTGGGACAAGGAGATATAGGTATGAAAATTTT<br>AATT                         | VncR<br>for pIU253                                                                                                       |
| AG103                                                                       | AGTAGGATCCTTATTTTCGCTCCAATTTATAA                                   |                                                                                                                          |
| AG114                                                                       | AACTGCAGCATAAGTCAAGGTGGACAAGGTGGC<br>TA                            | $\Delta$ N40-PnpS<br>for pIU255                                                                                          |
| AG115                                                                       | AGTAGGATCCTTAGTCCTGTGCGAAAGATTGG                                   |                                                                                                                          |
| SLi05                                                                       | GAAGACTCTTTGTTTCCAATGGTAGCCATGAGTT<br>ACGGACTCC                    | $\Delta$ N35-Walk <sup>V216G</sup><br>for pIU262                                                                         |
| SLi06                                                                       | GGAGTCCGTAACCTCATGGCTACCATTGGAAACA                                 |                                                                                                                          |

|       |                                                            |                                                  |
|-------|------------------------------------------------------------|--------------------------------------------------|
| AG26  | AAGAGTCTTC<br>GATGGATCCTTACTAGTCTTCTACTTCATCCTCC<br>CATAAC |                                                  |
| AG28  | ACTGGGACATTCTGTCAGAGGTCGTGATAATATT<br>CAGTTG               |                                                  |
| SLi07 | GACTCTTTGTTTCCAATGTT <b>GACCATGAGTTACG</b><br>GACTCCTCT    | $\Delta$ N35-Walk <sup>S217D</sup><br>for pIU263 |
| SLi08 | AGAGGAGTCCGTAACACTCAT <b>GGTCAACATTGGAA</b><br>ACAAAGAGTC  |                                                  |
| AG26  | GATGGATCCTTACTAGTCTTCTACTTCATCCTCC<br>CATAAC               |                                                  |
| AG28  | ACTGGGACATTCTGTCAGAGGTCGTGATAATATT<br>CAGTTG               |                                                  |
| SLi09 | GACTCTTTGTTTCCAATGTT <b>GCGCATGAGTTACG</b><br>GACTCCTCT    | $\Delta$ N35-Walk <sup>S217A</sup><br>for pIU264 |
| SLi10 | AGAGGAGTCCGTAACACTCAT <b>GCGCAACATTGGAA</b><br>ACAAAGAGTC  |                                                  |
| AG26  | GATGGATCCTTACTAGTCTTCTACTTCATCCTCC<br>CATAAC               |                                                  |
| AG28  | ACTGGGACATTCTGTCAGAGGTCGTGATAATATT<br>CAGTTG               |                                                  |
| SLi11 | CCAATGTTAGCCATGAGTTAG <b>GCGACTCCTCTGA</b><br>CTAGCGTAAA   | $\Delta$ N35-Walk <sup>R221A</sup><br>for pIU265 |
| SLi12 | TTTACGCTAGTCAGAGGAGT <b>CGCTAACTCATGG</b><br>CTAACATTGG    |                                                  |
| AG26  | GATGGATCCTTACTAGTCTTCTACTTCATCCTCC<br>CATAAC               |                                                  |
| AG28  | ACTGGGACATTCTGTCAGAGGTCGTGATAATATT<br>CAGTTG               |                                                  |
| SLi13 | TTAGCCATGAGTTACGGACT <b>TCTCTGACTAGCGT</b><br>AAAATCCTA    | $\Delta$ N35-Walk <sup>P223S</sup><br>for pIU266 |
| SLi14 | TAGGATTTTACGCTAGTCAG <b>AGAAGTCCGTAAC</b><br>TAAATCCTA     |                                                  |
| AG26  | GATGGATCCTTACTAGTCTTCTACTTCATCCTCC<br>CATAAC               |                                                  |
| AG28  | ACTGGGACATTCTGTCAGAGGTCGTGATAATATT<br>CAGTTG               |                                                  |
| SLi15 | TTAGCCATGAGTTACGGACT <b>GCTCTGACTAGCG</b><br>TAAATCCTA     | $\Delta$ N35-Walk <sup>P223A</sup><br>for pIU267 |
| SLi16 | TAGGATTTTACGCTAGTCAG <b>AGCAGTCCGTAAC</b><br>TAAATCCTA     |                                                  |
| AG26  | GATGGATCCTTACTAGTCTTCTACTTCATCCTCC<br>CATAAC               |                                                  |
| AG28  | ACTGGGACATTCTGTCAGAGGTCGTGATAATATT<br>CAGTTG               |                                                  |
|       |                                                            |                                                  |

|       |                                                           |                                                  |
|-------|-----------------------------------------------------------|--------------------------------------------------|
| SLi17 | ATGAGTTACGGACTCCTCTGGCTAGCGTAAAAT<br>CCTATCTTGA           | $\Delta$ N35-Walk <sup>I225A</sup><br>for pIU268 |
| SLi18 | TCAAGATAGGATTTTACGCT <b>AGCC</b> CAGAGGAGTC<br>CGTAACTCAT |                                                  |
| AG26  | GATGGATCCTTACTAGTCTTCTACTTCATCCTCC<br>CATA C              |                                                  |
| AG28  | ACTGGGACATTCTGTCAGAGGTCGTGATAATATT<br>CAGTTG              |                                                  |
| SLi25 | CCAATGTTAGCCATGAGTTA <b>AAA</b> ACTCCTCTGAC<br>TAGCGTAAA  | $\Delta$ N35-Walk <sup>R221K</sup><br>for pIU269 |
| SLi26 | TTTACGCTAGTCAGAGGAGT <b>TTTT</b> AACTCATGGC<br>TAACATTGG  |                                                  |
| AG26  | GATGGATCCTTACTAGTCTTCTACTTCATCCTCC<br>CATA C              |                                                  |
| AG28  | ACTGGGACATTCTGTCAGAGGTCGTGATAATATT<br>CAGTTG              |                                                  |
| SLi27 | CCAATGTTAGCCATGAGTTA <b>GAC</b> ACTCCTCTGAC<br>TAGCGTAAA  | $\Delta$ N35-Walk <sup>R221D</sup><br>for pIU270 |
| SLi28 | TTTACGCTAGTCAGAGGAGT <b>GTCT</b> AACTCATGG<br>CTAACATTGG  |                                                  |
| AG26  | GATGGATCCTTACTAGTCTTCTACTTCATCCTCC<br>CATA C              |                                                  |
| AG28  | ACTGGGACATTCTGTCAGAGGTCGTGATAATATT<br>CAGTTG              |                                                  |
| SLi29 | CCAATGTTAGCCATGAGTTA <b>TCT</b> ACTCCTCTGAC<br>TAGCGTAAA  | $\Delta$ N35-Walk <sup>R221S</sup><br>for pIU271 |
| SLi30 | TTTACGCTAGTCAGAGGAGT <b>AGATA</b> ACTCATGG<br>CTAACATTGG  |                                                  |
| AG26  | GATGGATCCTTACTAGTCTTCTACTTCATCCTCC<br>CATA C              |                                                  |
| AG28  | ACTGGGACATTCTGTCAGAGGTCGTGATAATATT<br>CAGTTG              |                                                  |
| SLi31 | ATGTTAGCCATGAGTTACGG <b>GCGC</b> CCTCTGACTA<br>GCGTAAAATC | $\Delta$ N35-Walk <sup>I222A</sup><br>for pIU272 |
| SLi32 | GATTTTACGCTAGTCAGAGG <b>CGCC</b> CGTAACTCA<br>TGGCTAACAT  |                                                  |
| AG26  | GATGGATCCTTACTAGTCTTCTACTTCATCCTCC<br>CATA C              |                                                  |
| AG28  | ACTGGGACATTCTGTCAGAGGTCGTGATAATATT<br>CAGTTG              |                                                  |
| SLi33 | ATGTTAGCCATGAGTTACGGT <b>ACC</b> CCTCTGACTA<br>GCGTAAAATC | $\Delta$ N35-Walk <sup>I222Y</sup><br>for pIU273 |
| SLi34 | GATTTTACGCTAGTCAGAGG <b>GTACC</b> GTAACAT<br>GGCTAACAT    |                                                  |
| AG26  | GATGGATCCTTACTAGTCTTCTACTTCATCCTCC<br>CATA C              |                                                  |

|                                       |                                                          |                                                  |
|---------------------------------------|----------------------------------------------------------|--------------------------------------------------|
| AG28                                  | ACTGGGACATTCTGTCAGAGGTCGTGATAATATT<br>CAGTTG             |                                                  |
| SLi35                                 | ATGTTAGCCATGAGTTACGGG <b>ACC</b> CTCTGACTA<br>GCGTAAAATC | $\Delta$ N35-Walk <sup>1222D</sup><br>for pIU274 |
| SLi36                                 | GATTTTACGCTAGTCAGAGGG <b>TCCC</b> GTAACAT<br>GGCTAACAT   |                                                  |
| AG26                                  | GATGGATCCTTACTAGTCTTCTACTTCATCCTCC<br>CATAAC             |                                                  |
| AG28                                  | ACTGGGACATTCTGTCAGAGGTCGTGATAATATT<br>CAGTTG             |                                                  |
| SLi41                                 | AACTGCAGCATAAGTCAAGGTAGTCGCTCTCTG<br>CCTCATTA            | $\Delta$ N130-PnpS<br>for pIU275                 |
| SLi44                                 | AGTAGGATCCTTAGTCCTGTGCGAAAGATTGG                         |                                                  |
| SLi42                                 | AACTGCAGCATAAGTCAAGGTCTCAAACGGATG<br>GATATTCG            | $\Delta$ N150-PnpS<br>for pIU276                 |
| SLi44                                 | AGTAGGATCCTTAGTCCTGTGCGAAAGATTGG                         |                                                  |
| SLi43                                 | AACTGCAGCATAAGTCAAGGTAAACAAGAAGTAA<br>GTGGGTT            | $\Delta$ N170-PnpS<br>for pIU277                 |
| SLi44                                 | AGTAGGATCCTTAGTCCTGTGCGAAAGATTGG                         |                                                  |
| AG86                                  | AACTGGGACAAGGAGATATAGGTATGAACATTTT<br>AGT                | RR06<br>for pIU279                               |
| AG87                                  | AGTAGGATCCTTATAAGCTAATCTTATACCCAAC<br>ATT                |                                                  |
| <b>Primers used for QPCR analyses</b> |                                                          |                                                  |
| Primer                                | Sequence (5' to 3')                                      | Target transcript                                |
| AL16                                  | AGTATCTGAATCTGCAGCAGCACC                                 | <i>pcsB</i>                                      |
| AL17                                  | TGCTCCAACCTTGAGGTGTTGAACC                                | <i>pcsB</i>                                      |
| AL33                                  | AGTGGTTATCGTCCAGGAGACAGT                                 | <i>spd_1874</i>                                  |
| AL34                                  | ATTGGGTTCCAAGTGTTAGCTGGC                                 | <i>spd_1874</i>                                  |
| KK489                                 | AAAGGTCGTGGTGGTAAGGGAATG                                 | <i>gyrA</i>                                      |
| KK490                                 | GCATCTTGATCCAGGCGCATTACT                                 | <i>gyrA</i>                                      |

<sup>a</sup>Sequences in bold letters represent introduced codon changes.



**Table S3. Proteins purified for this study<sup>a</sup>**

| Protein                                      | Source                   | Storage buffer <sup>b</sup> |
|----------------------------------------------|--------------------------|-----------------------------|
| (N)-Sumo- $\Delta$ N35-Walk                  | Gutu <i>et al</i> , 2010 | A                           |
| (N)-Sumo- $\Delta$ N210-CiaH                 | This study               | A                           |
| (N)-Sumo- $\Delta$ N165-HK06                 | This study               | A                           |
| (N)-Sumo- $\Delta$ N58-HK08                  | This study               | C2                          |
| (N)-Sumo- $\Delta$ N164-VncS                 | This study               | A                           |
| (N)-Sumo- $\Delta$ N206-PnpS                 | This study               | A                           |
| (N)-Sumo- $\Delta$ N40-PnpS                  | This study               | A                           |
| (N)-Sumo- $\Delta$ N130-PnpS                 | This study               | C2                          |
| (N)-Sumo- $\Delta$ N150-PnpS                 | This study               | C2                          |
| (N)-Sumo- $\Delta$ N170-PnpS                 | This study               | A                           |
| (N)-Sumo- $\Delta$ N35-Walk <sup>V216G</sup> | This study               | A                           |
| (N)-Sumo- $\Delta$ N35-Walk <sup>S217D</sup> | This study               | C2                          |
| (N)-Sumo- $\Delta$ N35-Walk <sup>S217A</sup> | This study               | A                           |
| (N)-Sumo- $\Delta$ N35-Walk <sup>R221A</sup> | This study               | C2                          |
| (N)-Sumo- $\Delta$ N35-Walk <sup>P223S</sup> | This study               | C2                          |
| (N)-Sumo- $\Delta$ N35-Walk <sup>P223A</sup> | This study               | C2                          |
| (N)-Sumo- $\Delta$ N35-Walk <sup>T225A</sup> | This study               | A                           |
| (N)-Sumo- $\Delta$ N35-Walk <sup>R221K</sup> | This study               | C2                          |
| (N)-Sumo- $\Delta$ N35-Walk <sup>R221D</sup> | This study               | A                           |
| (N)-Sumo- $\Delta$ N35-Walk <sup>R221S</sup> | This study               | A                           |
| (N)-Sumo- $\Delta$ N35-Walk <sup>T222A</sup> | This study               | A                           |

|                                              |                          |    |
|----------------------------------------------|--------------------------|----|
| (N)-Sumo- $\Delta$ N35-Walk <sup>I222Y</sup> | This study               | C2 |
| (N)-Sumo- $\Delta$ N35-Walk <sup>I222D</sup> | This study               | C2 |
| (N)-His-WalR                                 | Gutu <i>et al</i> , 2010 | D  |
| (N)-Sumo-VncR                                | This study               | D  |
| (N)-Sumo-RR06                                | This study               | C2 |

<sup>a</sup>Protein purification is described in Experimental procedures. *E. coli* strains used to express proteins from recombinant plasmids are listed in Table S1.

<sup>b</sup>Purified proteins were stored in the following buffers from Gutu *et al.*, 2010:

Buffer A: 10 mM Tris-HCl (pH 7.6), 0.1 mM EDTA, 50 mM KCl, 12% glycerol;

Buffer C2: 50 mM Tris-HCl (pH 7.6), 0.1 mM EDTA, 200 mM KCl, 30% glycerol;

Buffer D: 10 mM Tris-HCl (pH 7.6), 0.1 mM EDTA, 300 mM KCl, 0.1 mM DTT, 50% glycerol.

**Fig. S1.** Changes introduced into the DHP domain of pneumococcal Walk to identify amino acids important for phosphatase activity. Amino acids in black type on light gray (first row) are predicted to contact WalR (see (Howell *et al.*, 2006)). Amino acids in white type on charcoal were changed in this study to examine their effects on Walk autophosphorylation, phosphoryltransfer, and phosphatase activities (see Fig. 2, S2, S3, S4, S5, S6, and S7). His218 is autophosphorylated in Walk, and Walk M11 corresponds to the Walk<sup>T222A</sup> protein with strongly reduced phosphatase activity characterized in this study.

**Fig. S2.** Phosphorimages showing autophosphorylation of Walk mutant derivatives with amino acid changes in the DHP recognition helix (see Fig. S1). Autophosphorylation reactions containing 2.0  $\mu$ M of Walk mutant proteins were performed at 25°C as described in Experimental procedures. Samples were removed after 10, 30, and 60 min (shown left to right) and analyzed by 10% SDS-PAGE.

**Fig. S3.** Phosphorimages of combined assays showing phosphoryltransfer from Walk~P constructs to WalR and dephosphorylation of WalR~P. Reactions were performed at 25°C in reaction mixtures containing Mg<sup>2+</sup> or Ca<sup>2+</sup>, 2.0  $\mu$ M of purified truncated sensor kinase, and 6.6  $\mu$ M of (N)-His-WalR as described in Experimental procedures and Fig. 2. (A) and (E) (N)-Sumo- $\Delta$ N35-Walk<sup>+</sup>; (B) (N)-Sumo- $\Delta$ N35-Walk<sup>R221A</sup>; (C) (N)-Sumo- $\Delta$ N35- Walk<sup>T225A</sup>; (D) (N)-Sumo- $\Delta$ N35-Walk<sup>S217A</sup>; (F) (N)-Sumo- $\Delta$ N35-Walk<sup>R221S</sup>; (G) (N)-Sumo- $\Delta$ N35-Walk<sup>T222Y</sup>; and (H) (N)-Sumo- $\Delta$ N35-Walk<sup>R221K</sup>. Panels (A) through (D) also show samples removed after 1 min and 10 min of Walk autophosphorylation.

**Fig. S4.** Autophosphorylation reaction progress curves used to calculate kinetic parameters of truncated  $\text{Walk}^{\text{T222A}}$ . Representative curves are shown. Upper right: typical reaction time courses used to calculate initial rates of  $\text{Walk}^{\text{T222A}}$  autophosphorylation. Reactions containing 1.0  $\mu\text{M}$  of (N)-Sumo- $\Delta\text{N35-Walk}^{\text{T222A}}$  protein and the indicated concentrations of ATP were carried out at 25°C as described in Experimental procedures. Lower graph: velocity versus ATP concentration curve used to calculate  $K_m$  (ATP) and  $k_{\text{cat}}$  for truncated  $\text{Walk}^{\text{T222A}}$  listed in the table. Similar assays (not shown) were performed to determine the kinetic parameters listed for (N)-Sumo- $\Delta\text{N35-Walk}^+$ . Means with standard errors based on the number (n) of independent determinations are indicated.

**Fig. S5.** Half-lives of  $\text{Walk}^+ \sim \text{P}$  and  $\text{Walk}^{\text{T222A}} \sim \text{P}$  in phosphoryltransferase reactions to WalR. Reactions were performed at 25°C in mixtures containing  $\text{Mg}^{2+}$  or  $\text{Ca}^{2+}$  buffer as described in Experimental procedures. Autophosphorylation reactions containing 3.0  $\mu\text{M}$  of purified (N)-Sumo- $\Delta\text{N35-Walk}^+$  or (N)-Sumo- $\Delta\text{N35-Walk}^{\text{T222A}}$  protein proceeded for 20 min. Free ATP was removed from reactions using a spin-desalting column, after which (N)-His-WalR (final concn = 0.5 or 1.0  $\mu\text{M}$ ) was added to the reaction to initiate phosphoryltransfer. Half-lives of  $\text{Walk} \sim \text{P}$  and  $\text{Walk}^{\text{T222A}} \sim \text{P}$  were determined from exponential decay plots after the addition of WalR. Means and standard errors of two independent experiments are shown. Under the reaction conditions used, the half-lives of  $\text{Walk} \sim \text{P}$  reflect the kinetic preference ( $k_{\text{cat}}/K_m$ ) of the phosphoryltransferase reaction (see (Gutu *et. al.*, 2010)).

**Fig. S6.** Representative HPLC chromatograms of dephosphorylation of WalR~P by  $\text{Walk}^+$  and  $\text{Walk}^{\text{T222A}}$  after a 1 h incubation. (A) No Walk (WalR~P

autodephosphorylation); (B) Walk<sup>+</sup>; and (C) Walk<sup>T222A</sup>. Dephosphorylation analysis is described in Experimental procedures. The identities of the protein peaks are indicated. The No Walk and Walk<sup>+</sup> or Walk<sup>T222A</sup> experiments were performed twice or four times, respectively, with similar results.

**Fig. S7.** Phosphatase reaction progress curves showing dephosphorylation of WalR~P mediated by truncated Walk<sup>T222A</sup>. Representative curves are shown. Reaction mixtures containing 3.0 μM to 6.0 μM of WalR~P, 2.0 μM of Walk<sup>T222A</sup>, and 13.2 μM of ADP were incubated at 25°C and amounts of remaining WalR~P were determined by HPLC as described in Experimental procedures. The experiment was performed independently 5 times, and the mean half-life of WalR~P with standard error is listed. For comparison, WalR~P autodephosphorylation (no Walk<sup>+</sup>) and dephosphorylation by Walk<sup>+</sup> determined previously (Gutu *et al.*, 2010) are shown in the graph and listed in the table. Reduced Walk<sup>T222A</sup> phosphatase activity compared to that of Walk<sup>+</sup> was confirmed directly for the 60 min incubation time (Fig. S6).

**Fig. S8.** Growth and survival of *walk*<sup>+</sup> and *walk* mutant strains. (A) Representative growth curves of *walk*<sup>+</sup> parent strain IU1781 (D39 *rpsL1*) and isogenic mutant strains IU3102 (D39 *rpsL1 walk*<sup>H218A</sup>) and IU5401 (D39 *rpsL1 walk*<sup>T222A</sup>) in static BHI broth cultures at 37°C in an atmosphere of 5% CO<sub>2</sub>. Samples were removed for live-dead staining as described in Experimental procedures at mid-exponential (E<sup>M</sup>), late-exponential (E<sup>L</sup>), transition (T), and stationary (S) growth phases (arrows). (B) Percentage of live cells in cultures of the *walk*<sup>+</sup>, *walk*<sup>H218A</sup>, and *walk*<sup>T222A</sup> strains at different phases of growth determined by live-dead staining. Averages and standard errors for each growth point reflect data from three independent cultures of each strain.

Total number of cells counted for each growth point: *walk*<sup>+</sup> E<sup>M</sup> (1,022), E<sup>L</sup> (2,123), T (2,226), S (2,819); *walk*<sup>H218A</sup> E<sup>M</sup> (1,047), E<sup>L</sup> (2,326), T (1,782), S (1,679); *walk*<sup>T222A</sup> E<sup>M</sup> (681), E<sup>L</sup> (1,235), T (2,500), S (2,710). (C) Relative cellular amounts of Walk<sup>+</sup>-FLAG (IU3299), Walk<sup>H218A</sup>-FLAG (IU3301), and Walk<sup>ΔPAS</sup>-FLAG (IU3307) in exponentially growing bacteria. Strains were grown to an OD<sub>620</sub> ≈0.2. Samples were prepared, and equal volumes of cell extracts (normalized for OD<sub>620</sub>) were analyzed by 10% SDS-PAGE and Western blotting with anti-FLAG antibody as described previously in (Wayne *et al.*, 2010). Chemiluminescent images were captured and quantitated in arbitrary units. Predicted sizes of proteins: Walk<sup>+</sup>-FLAG and Walk<sup>H218A</sup>-FLAG , 52.7 kDa; Walk<sup>ΔPAS</sup>-FLAG, 41.9 kDa.

**Fig. S9.** Viability of *walk*<sup>+</sup> and *walk* mutant strains during exponential growth and stationary phase. *walk*<sup>+</sup> (IU1781), *walk*<sup>H218A</sup> (IU3102), and *walk*<sup>T222A</sup> (IU5401) strains were grown in static BHI broth culture at 37°C in an atmosphere of 5% CO<sub>2</sub>. Samples were removed for staining with live-dead fluorescent dyes as described in Experimental procedures at the growth phases indicated in Fig. S8A. OD<sub>620</sub> of cultures sampled during mid-exponential (E<sup>M</sup>) phase: 0.10 to 0.12; transition (T) phase: 0.51 to 0.61 (*walk*<sup>+</sup> and *walk*<sup>T222A</sup>) or 0.28 to 0.30 (*walk*<sup>H218A</sup>); stationary (S) phase: 0.54 to 0.67 (*walk*<sup>+</sup> and *walk*<sup>T222A</sup>) or 0.30 to 0.35 (*walk*<sup>H218A</sup>). Representative phase-contrast and fluorescent micrographs are shown of *walk*<sup>+</sup> and *walk* mutant strains at mid-exponential and stationary phases of growth. Bacteria are false-colored green (live; stained with SYTO-9) and red (dead; stained with propidium iodide). Scale bar = 1 micron. We did not detect significant differences in the number of intact cells in cultures of the *walk*<sup>+</sup>

and *walk* mutant strains at the times sampled in the exponential, transition, or stationary growth phase (data not shown).

**Fig. S10.** WalRK regulon expression in *walk*<sup>+</sup>, *walk* autokinase-deficient, and  $\Delta$ *walk* //*walk*<sup>+</sup> complementation strains during exponential growth. Strains were grown statically in BHI broth culture to OD<sub>620</sub>  $\approx$ 0.2 at 37°C in an atmosphere of 5% CO<sub>2</sub>. RNA samples for QRT-PCR analysis were prepared and analyzed as described in Experimental procedures. Amount of *pcsB* or *spd\_1874* transcript was normalized to that of *gyrA* for each sample. Transcript amounts are expressed relative to that of the *walk*<sup>+</sup> parent and represent averages from duplicate samples from at least two independent experiments. Unpaired two-tailed t tests were performed using GraphPad Prism 5 software. Strains used: *walk*<sup>+</sup> parent (IU1781); *walk*<sup>H218A</sup> mutant (IU3102),  $\Delta$ *walk* mutant (IU1896);  $\Delta$ *walk* //*bgaA::P<sub>fcsK</sub>-walk*<sup>+</sup> complemented strain (IU5352) (Table S1). (A) Relative *pcsB* transcript amounts in *walk*<sup>+</sup> and *walk*<sup>H218A</sup> strains during exponential growth. (B) Relative *spd\_1874* transcript amounts in *walk*<sup>+</sup>,  $\Delta$ *walk*, and complemented  $\Delta$ *walk* *bgaA::P<sub>fcsK</sub>-walk*<sup>+</sup> strains during exponential growth. IU5352 was cultured in BHI broth supplemented with 1% fucose during overnight and final growths.

**Fig. S11.** Validation of Phos-tag SDS-PAGE method for detection of WalR~P in biochemical reactions and cellular extracts. (A) Separation of WalR~P and WalR by 25  $\mu$ M Phos-tag SDS-PAGE. WalR was phosphorylated by acetyl phosphate in a biochemical reaction as described in Experimental procedures and (Gutu *et al.*, 2010). Proteins were detected by staining with Coomassie brilliant blue. (B) Detection of different relative amounts of WalR~P and WalR by Western blotting. WalR was phosphorylated by acetyl phosphate, and WalR~P and WalR were mixed in the

proportions shown and analyzed by 25  $\mu$ M Phos-tag SDS-PAGE and Western blotting as described in Experimental procedures. Subsequent gels contained 50 or 75  $\mu$ M Phos-tag acrylamide to increase resolution. (C) Demonstration that WalR and WalR~P can be detected in cellular extracts prepared as described in Experimental procedures. Proteins were resolved on 50  $\mu$ M Phos-tag SDS-PAGE and detected by Western blotting with anti-WalR antibody. Left 2 lanes, extracts of a  $\Delta walR$   $P_c$ - $pcsB^+$  control strain (EL1472) (Ng *et al.*, 2003) showing that WalR is not detected. Right 2 lanes, extracts of encapsulated  $walRK^+$   $pcsB^+$  strain (IU1781) grown exponentially (lane 4) or treated with a sublethal concentration of an antibiotic (lane 3) to stimulate WalR phosphorylation (K. M. Kazmierczak, in preparation). The WalR~P band in lane 3 was heat-labile (data not shown; see Fig. 5 and S12). The faint contaminant band indicated ran just above WalR~P or between WalR~P and WalR on 50 or 75  $\mu$ M Phos-tag SDS-PAGE, respectively (see Fig. 5). Titration experiments indicated the distance of the shift of WalR~P from WalR was approximately linear with the concentration of Phos-tag acrylamide in the gels (data not shown). 75  $\mu$ M Phos-tag SDS-PAGE gave the best and most consistent resolution of WalR~P from WalR for quantitation. See text for additional details.

**Fig. S12.** Heated controls for samples in Fig. 5. Samples were heated at 95°C for 10 min before 75  $\mu$ M Phos-tag SDS-PAGE as described in Experimental procedures. The expected position of WalR~P is indicated. See Fig. 5 and the text for additional details.

**Fig. S13.** Phosphorimages showing dephosphorylation of WalR~P mediated by Walk and Walk<sup>T222A</sup> in combined assays containing physiologically relevant molar ratios of Walk sensor kinase to WalR response regulator (1: 6.7). Combined assays were



performed at the indicated molar ratios of Walk<sup>+</sup> or Walk<sup>T222A</sup> to WalR as described in Experimental procedures. The accumulation of WalR~P after 30 min is graphed in Fig. 6, and similar trends were seen on graphs of the 1 min and 60 min time points (data not shown). The experiment was performed 3 times independently with similar results.

**Fig. S14.** Comparison of amino acid sequence of the DHP helix sequence of Walk with that of other related pneumococcal HisKA-family sensor kinases. Amino acids in black type on light gray are predicted to contact WalR (see (Howell et al., 2006)). Amino acids with similar physico-chemical properties are indicated in light gray type. Dissimilar amino acids are indicated in white type on a charcoal background. The last column summarizes whether the indicated phosphorylated sensor kinase engaged in phosphoryltransfer to WalR in biochemical reactions (see Fig. S15 and Experimental procedures). +/- indicates low levels of WalR~P were detected in phosphoryltransferase reactions after long incubation times of 10 and 30 min. +++ indicates that WalR~P was detected within 1 min in phosphoryltransferase reactions containing cognate Walk~P, despite the Walk phosphatase activity (Fig. 2 and S7).

**Fig. S15.** Phosphorimages showing phosphorylation of WalR to WalR~P by cognate Walk~P and non-cognate phosphorylated HisKA-family sensor kinases of *S. pneumoniae* (Fig. S14). Combined assays were carried out at 25°C in reaction mixtures containing Mg<sup>2+</sup> or Ca<sup>2+</sup> as described in Experimental procedures. Experiments were repeated multiple times, and representative time courses are shown. WalR was incubated with autophosphorylated: (A) (N)-Sumo-ΔN35-Walk; (B) (N)-Sumo-ΔN206-PnpS; (C) (N)-Sumo-ΔN58-HK08; (D) (N)-Sumo-ΔN210-CiaH; (E) (N)-Sumo-ΔN164-VncS; and (F) (N)-Sumo-ΔN165-HK06. Arrows indicate low levels of WalR~P formed in

these reactions. The lack of accumulation of WalR~P in reactions containing WalkK reflects WalkK phosphatase activity (see Fig. 2 and S7). For non-cognate sensor kinases, low levels of WalR~P formation reflect kinetically unfavorable kinetics of phosphoryltransfer. See text for additional details. Autophosphorylated (N)-Sumo- $\Delta$ N164-VncS and (N)-Sumo- $\Delta$ N165-HK06 did not transfer a phosphoryl group to WalR, but could phosphorylate their cognate response regulators, (N)-Sumo-VncR (G) and (N)-Sumo-RR06 (H), respectively.

**Fig. S16.** Model for regulation of WalkK phosphatase activity by its PAS domain. (A) structure of the interaction between ThkA histidine kinase and its cognate response regulator TrrA from *Thermotoga martima* reported in (Yamada *et al.*, 2009). In this structural model, the PAS domain of the ThkA histidine kinase contacts the TrrA response regulator. This interaction may contribute to the requirement of the PAS domain for optimal ThkA-mediated phosphatase activity on TrrA~P (Yamada *et al.*, 2009). (B) By analogy, results presented here and in (Gutu *et al.*, 2010) indicate that the predominant default activity of WalkK is its phosphatase activity against WalR~P, both in biochemical reactions (Fig. 2 and 6) and in exponentially growing cells (Fig.1, 4, 5). Stress conditions like cell wall damage may cause a ligand or protein, or both, to bind to the PAS domain of WalkK, thereby turning the phosphatase activity down or off to allow accumulation of WalR~P formed by phosphoryltransfer from WalkK~P, whose formation might also increase in response to the stress (Fig. 1). This model will be tested in future studies.

## References

- Barbieri, C. M. and A. M. Stock, (2008) Universally applicable methods for monitoring response regulator aspartate phosphorylation both *in vitro* and *in vivo* using Phos-tag-based reagents. *Analyt Biochem* **376**: 73-82.
- Gutu, A. D., K. J. Wayne, L. T. Sham & M. E. Winkler, (2010) Kinetic characterization of the WalRK<sub>Spn</sub> (VicRK) two-component system of *Streptococcus pneumoniae*: dependence of Walk<sub>Spn</sub> (Vick) phosphatase activity on its PAS domain. *J Bacteriol* **192**: 2346-2358.
- Howell, A., S. Dubrac, D. Noone, K. I. Varughese & K. Devine, (2006) Interactions between the YycFG and PhoPR two-component systems in *Bacillus subtilis*: the PhoR kinase phosphorylates the non-cognate YycF response regulator upon phosphate limitation. *Mol Microbiol* **59**: 1199-1215.
- Lanie, J. A., W. L. Ng, K. M. Kazmierczak, T. M. Andrzejewski, T. M. Davidsen, K. J. Wayne, H. Tettelin, J. I. Glass & M. E. Winkler, (2007) Genome sequence of Avery's virulent serotype 2 strain D39 of *Streptococcus pneumoniae* and comparison with that of unencapsulated laboratory strain R6. *J Bacteriol* **189**: 38-51.
- Ng, W. L., G. T. Robertson, K. M. Kazmierczak, J. Zhao, R. Gilmour & M. E. Winkler, (2003) Constitutive expression of PcsB suppresses the requirement for the essential VicR (YycF) response regulator in *Streptococcus pneumoniae* R6. *Molecular Microbiology* **50**: 1647-1663.
- Ng, W. L., H. C. Tsui & M. E. Winkler, (2005) Regulation of the *pspA* virulence factor and essential *pcsB* murein biosynthetic genes by the phosphorylated VicR (YycF) response regulator in *Streptococcus pneumoniae*. *J Bacteriol* **187**: 7444-7459.
- Ramos-Montanez, S., H. C. Tsui, K. J. Wayne, J. L. Morris, L. E. Peters, F. Zhang, K. M. Kazmierczak, L. T. Sham & M. E. Winkler, (2008) Polymorphism and regulation of the *spxB* (pyruvate oxidase) virulence factor gene by a CBS-HotDog domain protein (SpxR) in serotype 2 *Streptococcus pneumoniae*. *Mol Microbiol* **67**: 729-746.
- Wayne, K. J., L. T. Sham, H. C. Tsui, A. D. Gutu, S. M. Barendt, S. K. Keen and M. E. Winkler, (2010) Localization and cellular amounts of the WalRKJ (VicRKX) two-component regulatory system proteins in serotype 2 *Streptococcus pneumoniae*. *J Bacteriol* **192**: 4388-4394.
- Yamada, S., H. Sugimoto, M. Kobayashi, A. Ohno, H. Nakamura & Y. Shiro, (2009) Structure of PAS-linked histidine kinase and the response regulator complex. *Structure* **17**: 1333-1344.

|                 |   |   | 218<br>~P |   |   |   |   |   |   |   |
|-----------------|---|---|-----------|---|---|---|---|---|---|---|
| WalK            | V | S | H         | E | L | R | T | P | L | T |
| WalK M1         | G |   |           |   |   |   |   |   |   |   |
| WalK M2         |   | D |           |   |   |   |   |   |   |   |
| WalK M3         |   | A |           |   |   |   |   |   |   |   |
| WalK M4         |   |   |           |   |   | A |   |   |   |   |
| WalK M5         |   |   |           |   |   |   |   | S |   |   |
| WalK M6         |   |   |           |   |   |   |   | A |   |   |
| WalK M7         |   |   |           |   |   |   |   |   |   | A |
| WalK M8         |   |   |           |   |   | K |   |   |   |   |
| WalK M9         |   |   |           |   |   | D |   |   |   |   |
| WalK M10        |   |   |           |   |   | S |   |   |   |   |
| <b>WalK M11</b> |   |   |           |   |   |   | A |   |   |   |
| WalK M12        |   |   |           |   |   |   | Y |   |   |   |
| WalK M13        |   |   |           |   |   |   | D |   |   |   |

Amino acids that contact WalR

Changed amino acids in mutants

Fig. S1

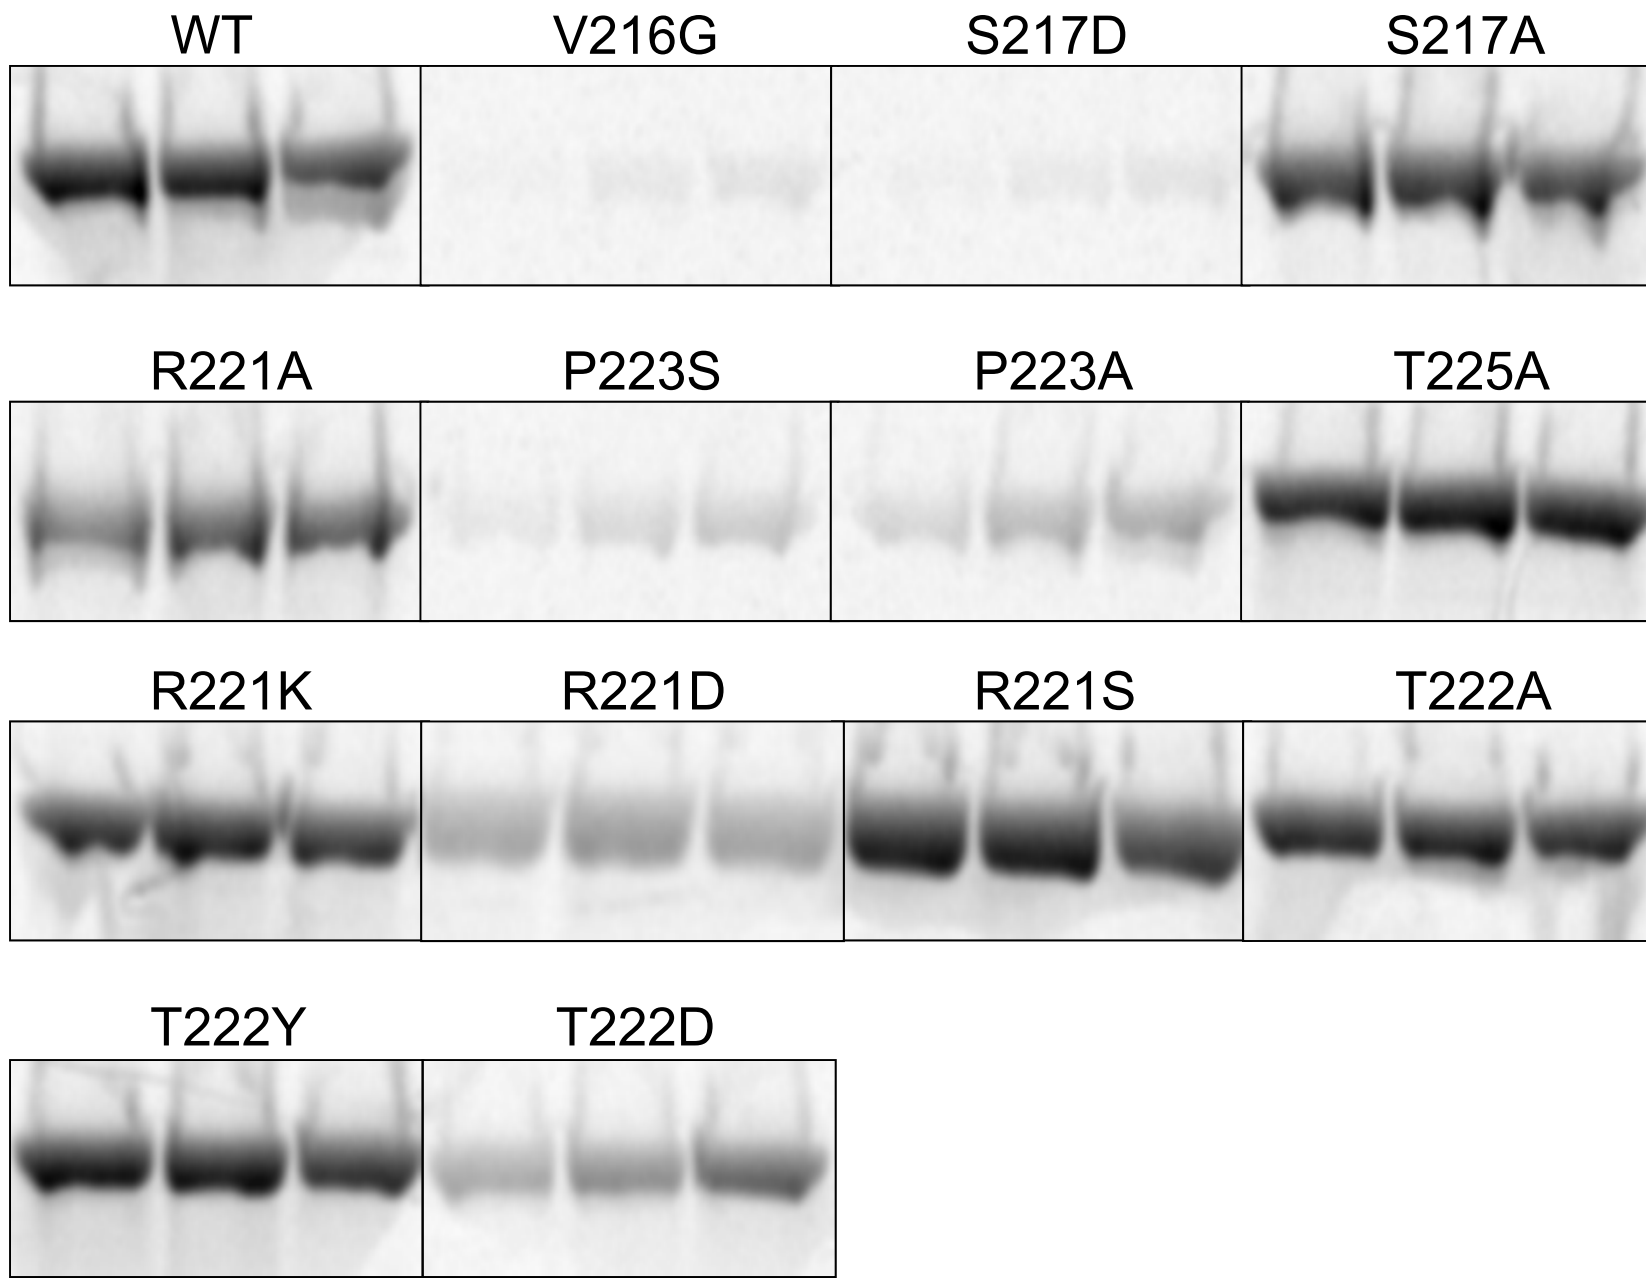

Fig. S2

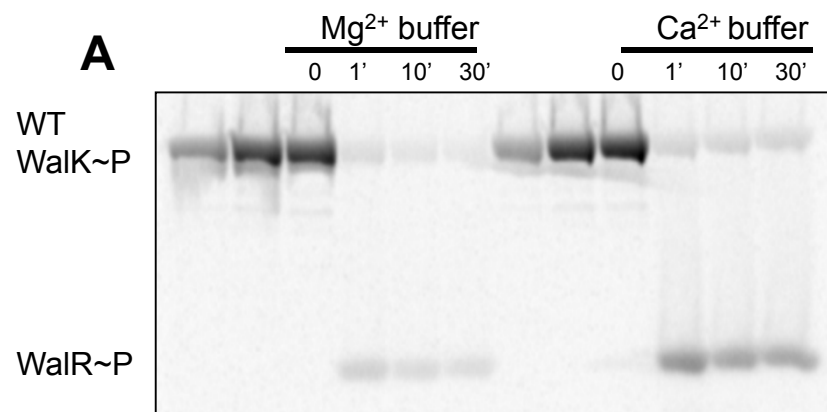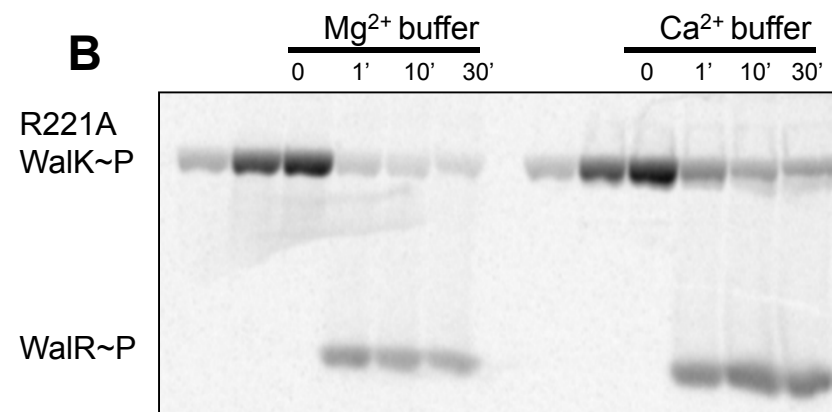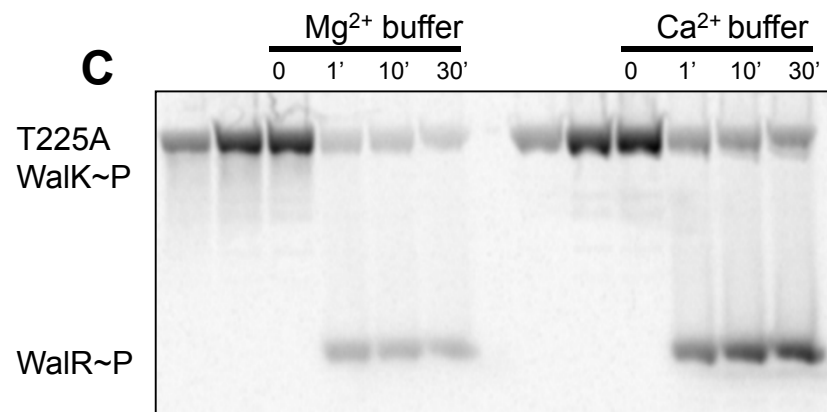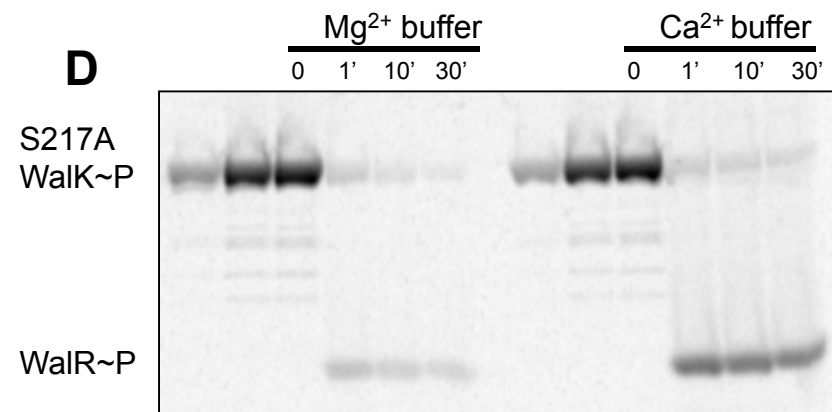

Fig. S3

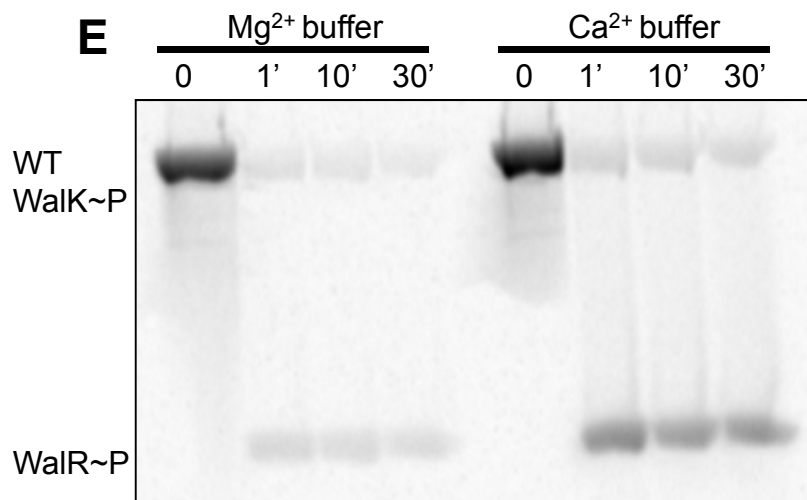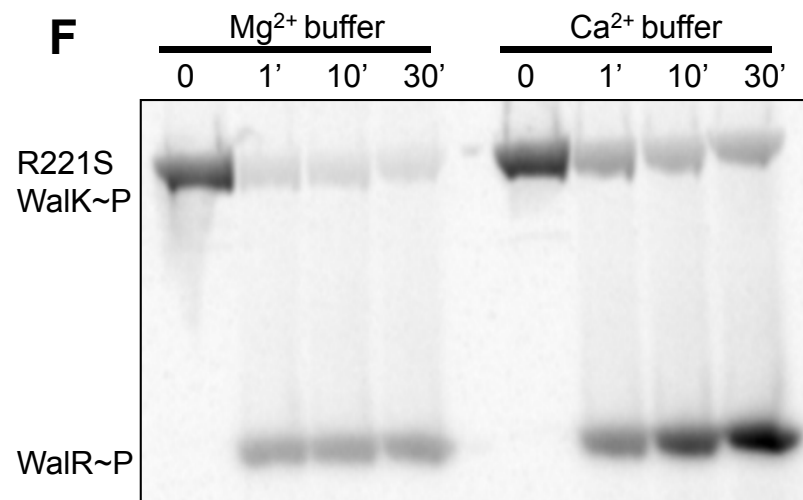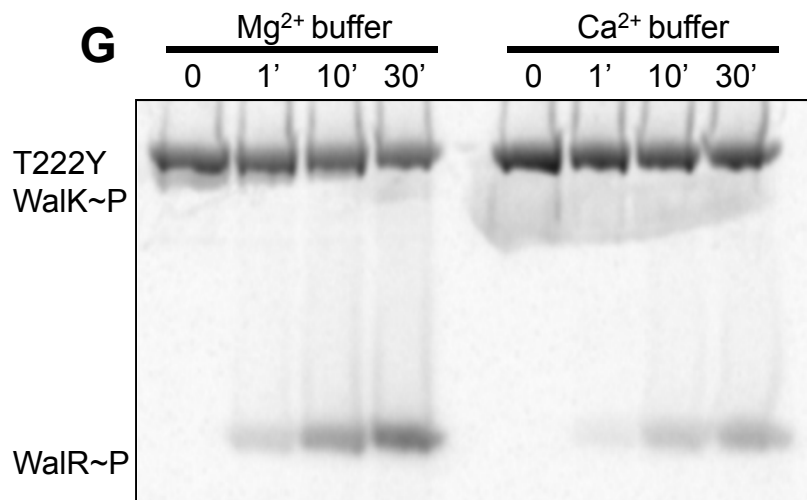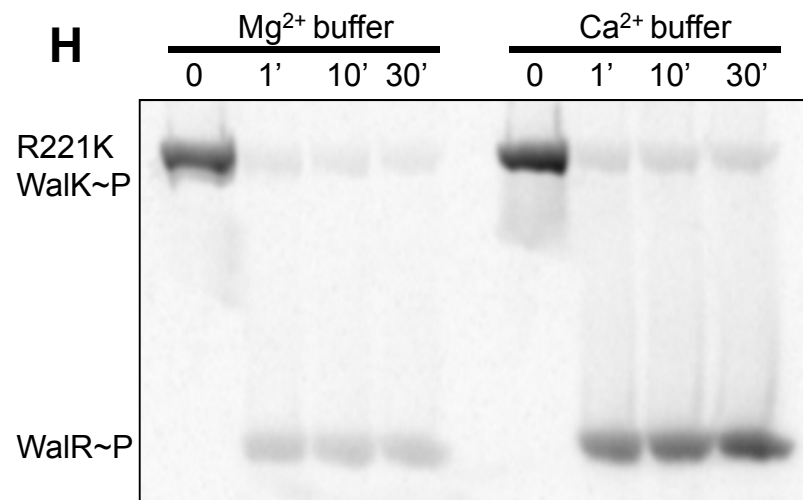

Fig. S3 (continued)

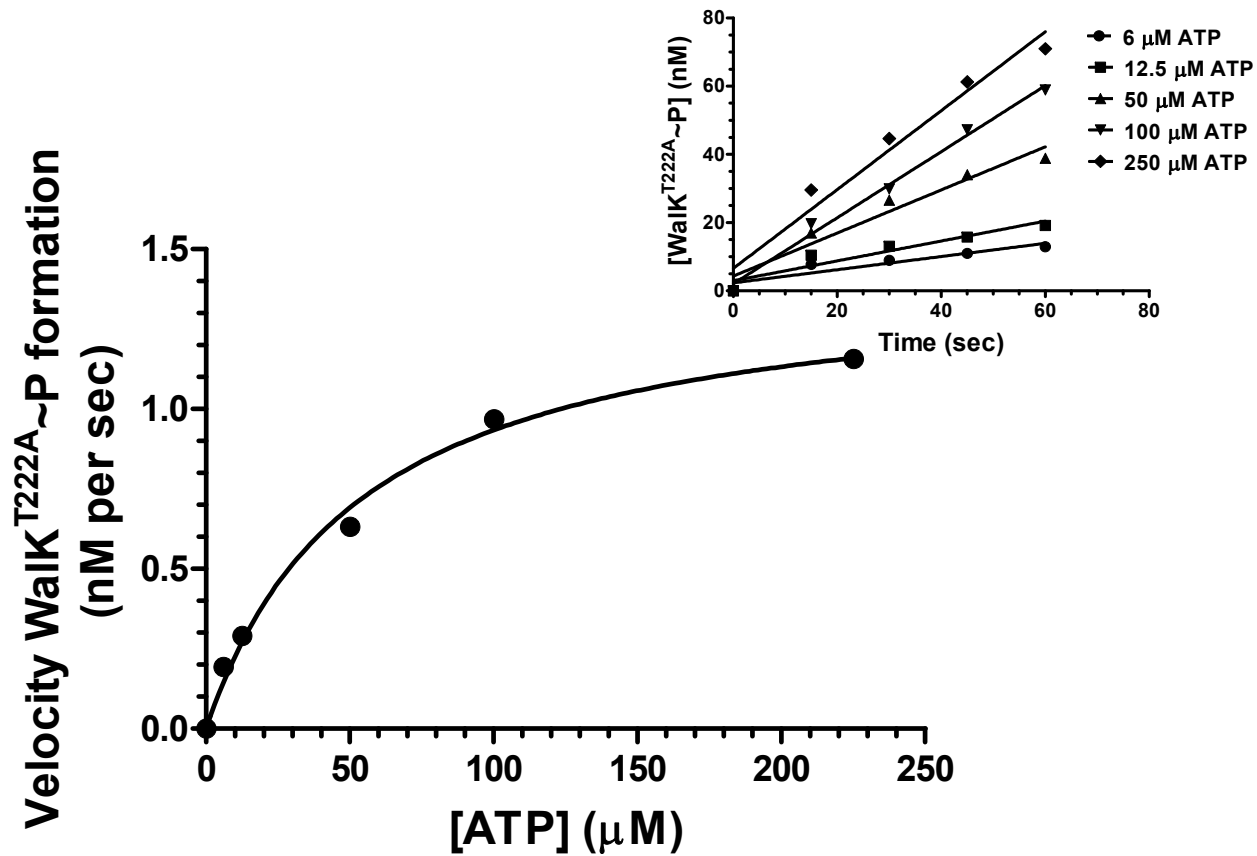

| WaIK construct                                                         | $K_m(\text{ATP})(\mu\text{M})$ | $k_{\text{cat}} (\text{min}^{-1})$ | $k_{\text{cat}} / K_m (\text{M}^{-1} \text{min}^{-1})$ |
|------------------------------------------------------------------------|--------------------------------|------------------------------------|--------------------------------------------------------|
| (N)-Sumo- $\Delta\text{N35}$ -<br>WaIK <sub>Spn</sub> <sup>+</sup>     | $64.1 \pm 8.3$<br>(n=4)        | $0.175 \pm 0.012$<br>(n=4)         | $2,800 \pm 172$                                        |
| (N)-Sumo- $\Delta\text{N35}$ -<br>WaIK <sub>Spn</sub> <sup>T222A</sup> | $71.9 \pm 5.7$<br>(n=8)        | $0.079 \pm 0.004$<br>(n=8)         | $1130 \pm 74$                                          |

Fig. S4



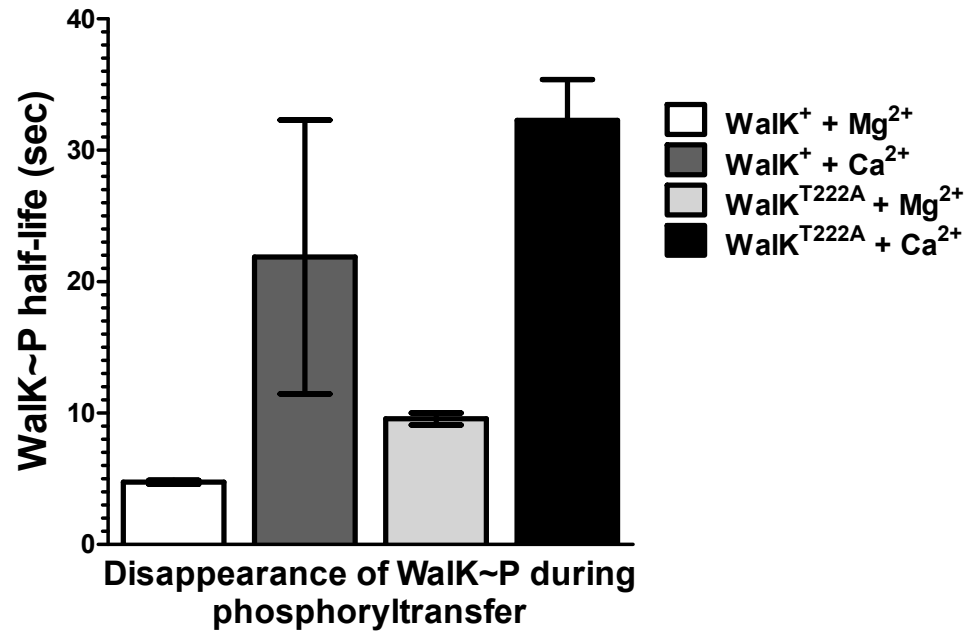

Fig. S5

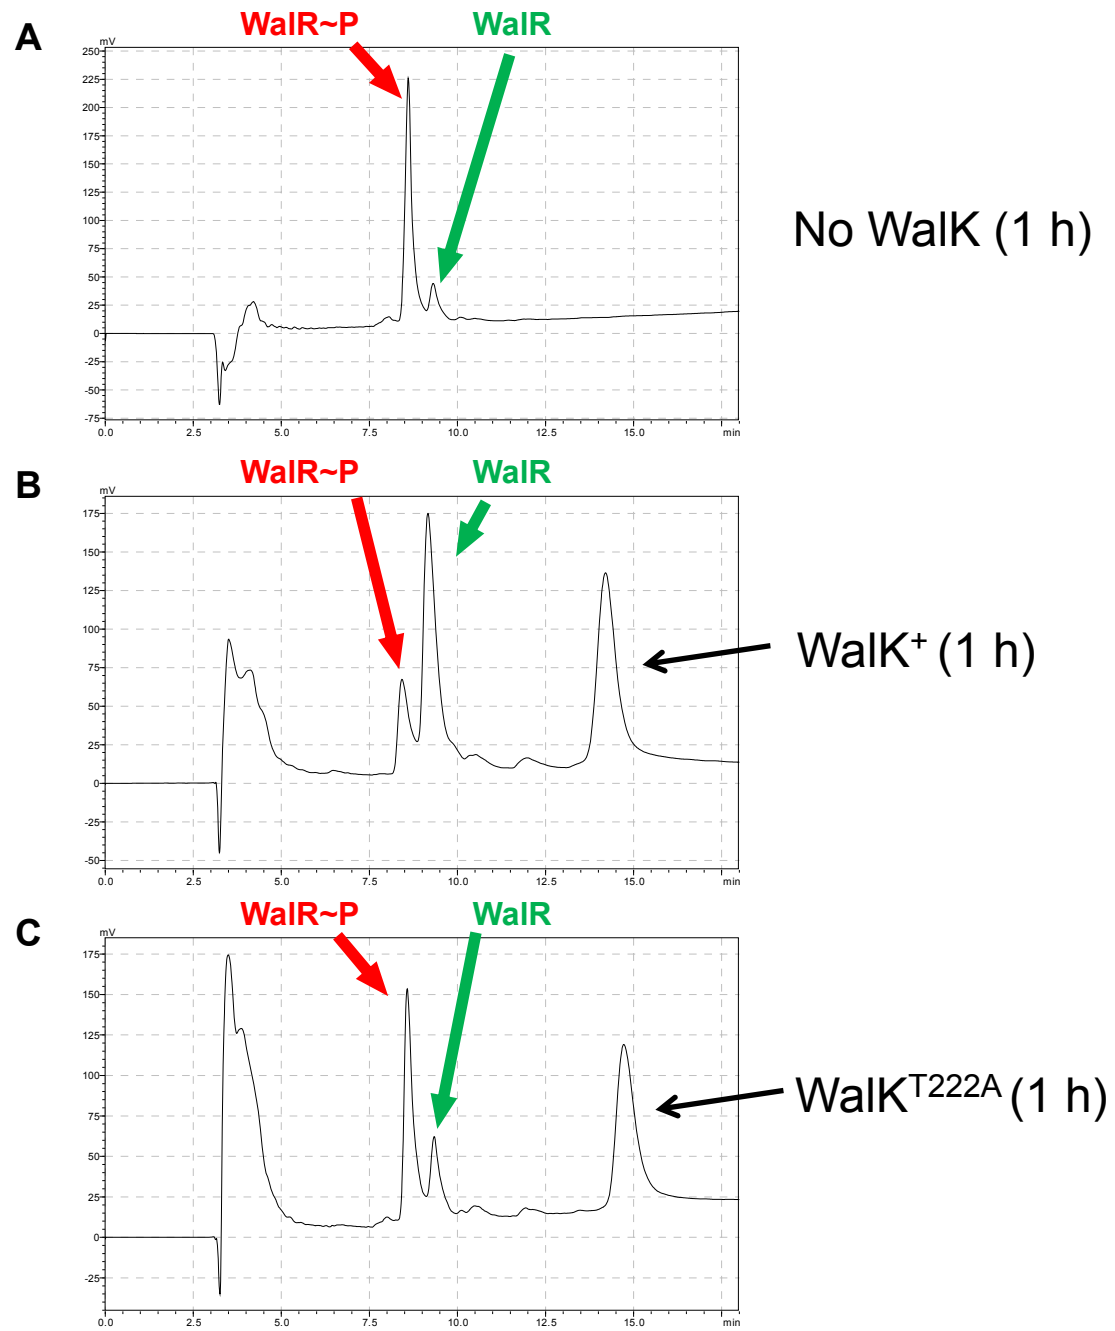

Fig. S6

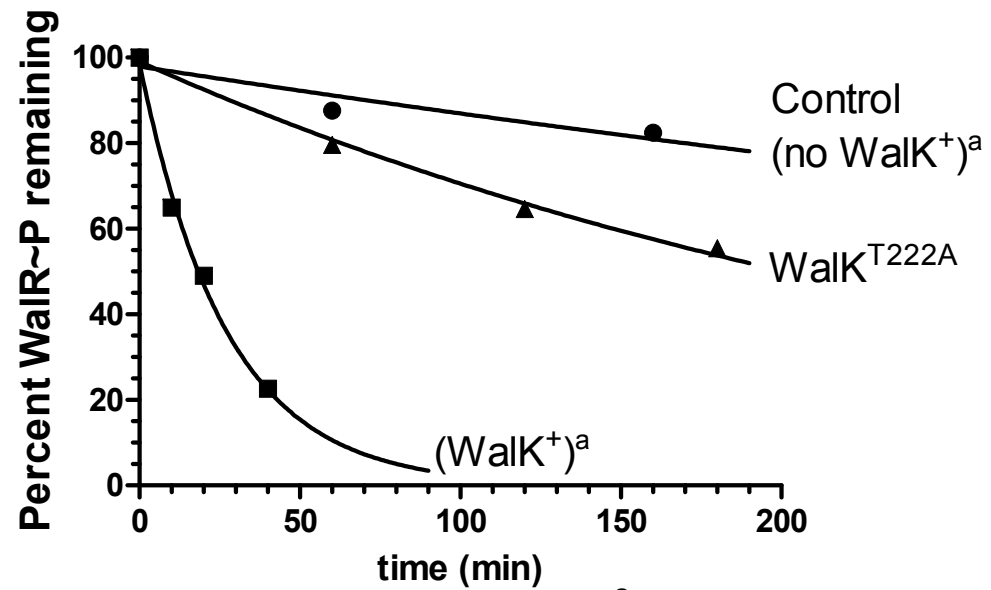

<sup>a</sup>Data from Gutu *et al.*, 2010

|                                                             | $k$ (min <sup>-1</sup> ) | WalR~P half life (min) |
|-------------------------------------------------------------|--------------------------|------------------------|
| <sup>a</sup> (N)-His-WalR <sub>Spn</sub> <sup>+</sup>       | 0.0006 ± 0.0001          | 1,370 ± 320            |
| <sup>a</sup> (N)-Sumo-ΔN35-WalK <sub>Spn</sub> <sup>+</sup> | 0.036 ± 0.001            | 18.9 ± 0.4             |
| (N)-Sumo-ΔN35-WalK <sub>Spn</sub> <sup>T222A</sup>          | 0.0029 ± 0.0002 (n=5)    | 240 ± 15 (n=5)         |

Fig. S7

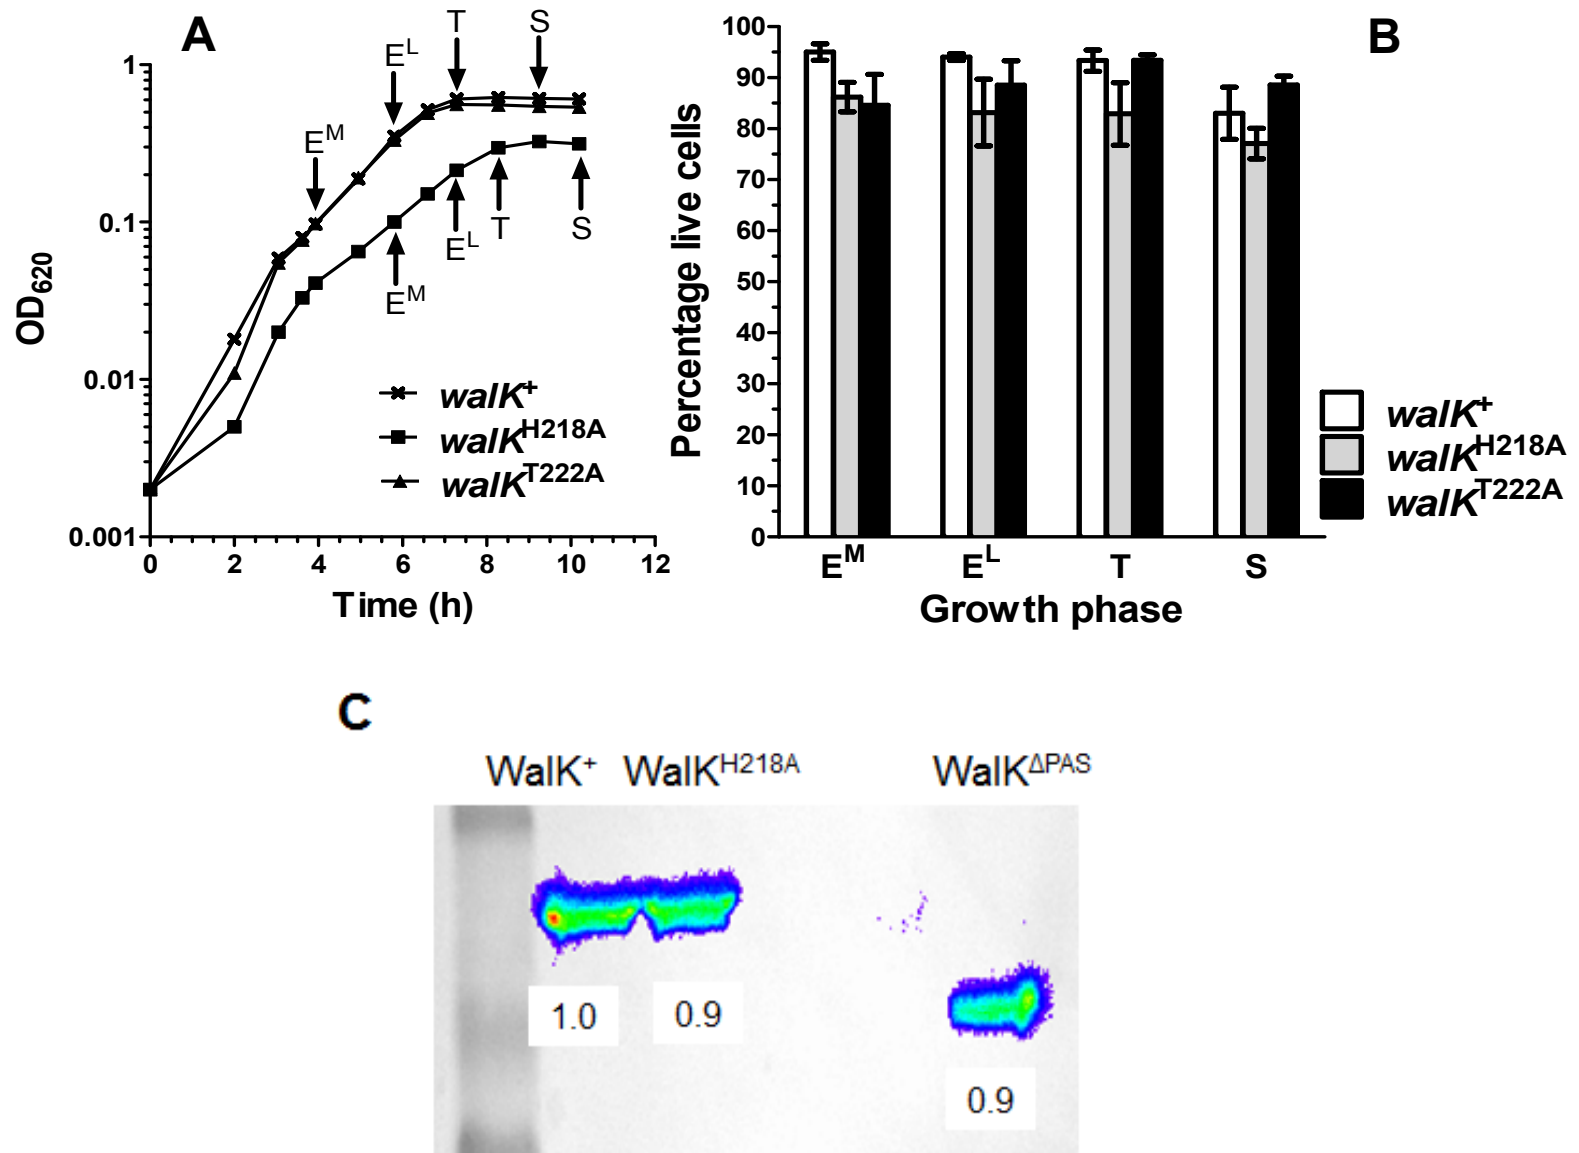

Fig. S8

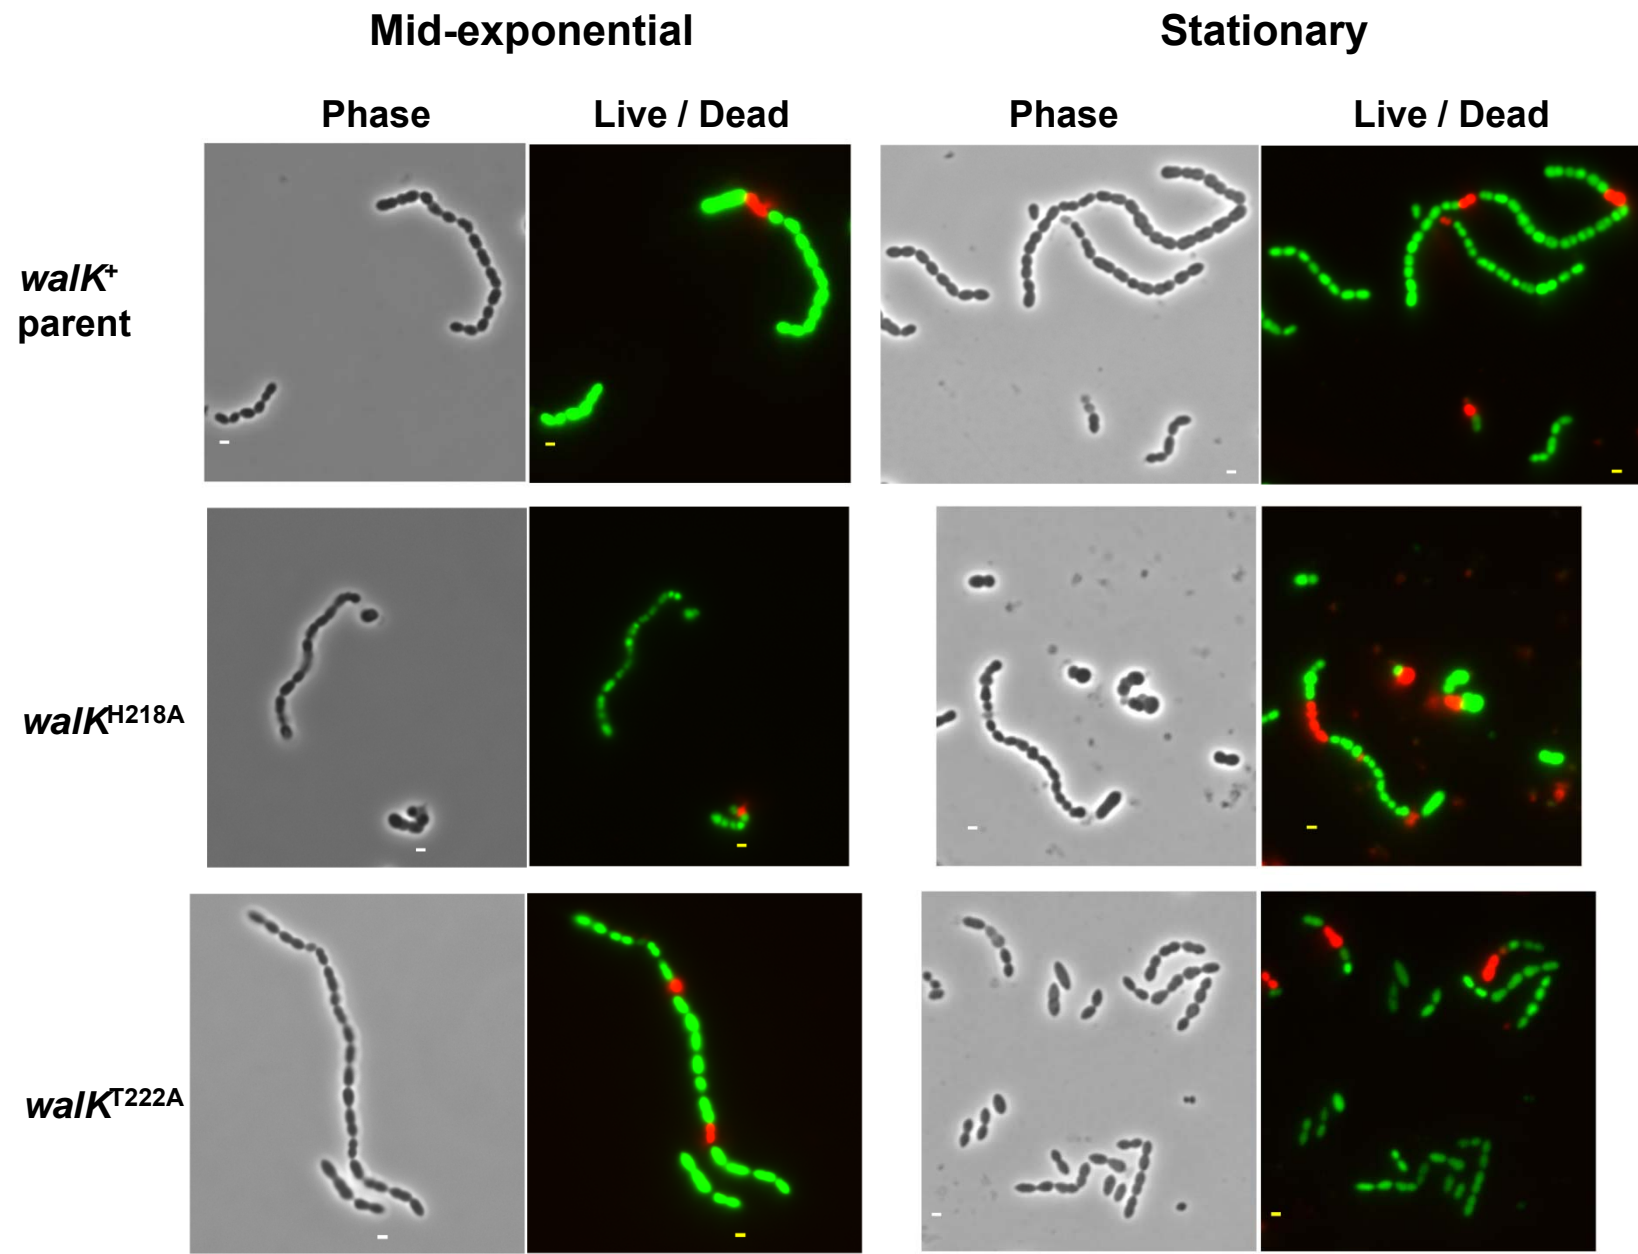

Fig. S9

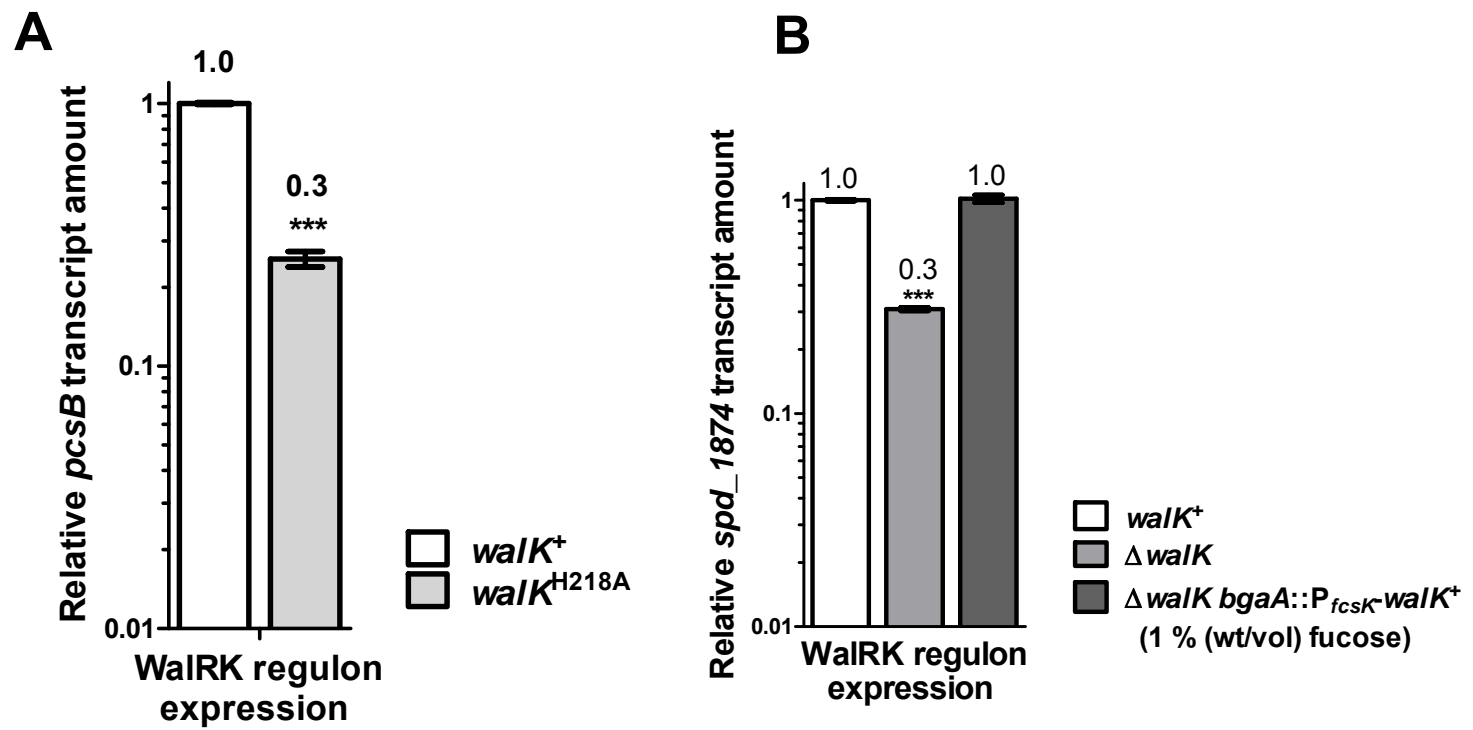

Fig. S10

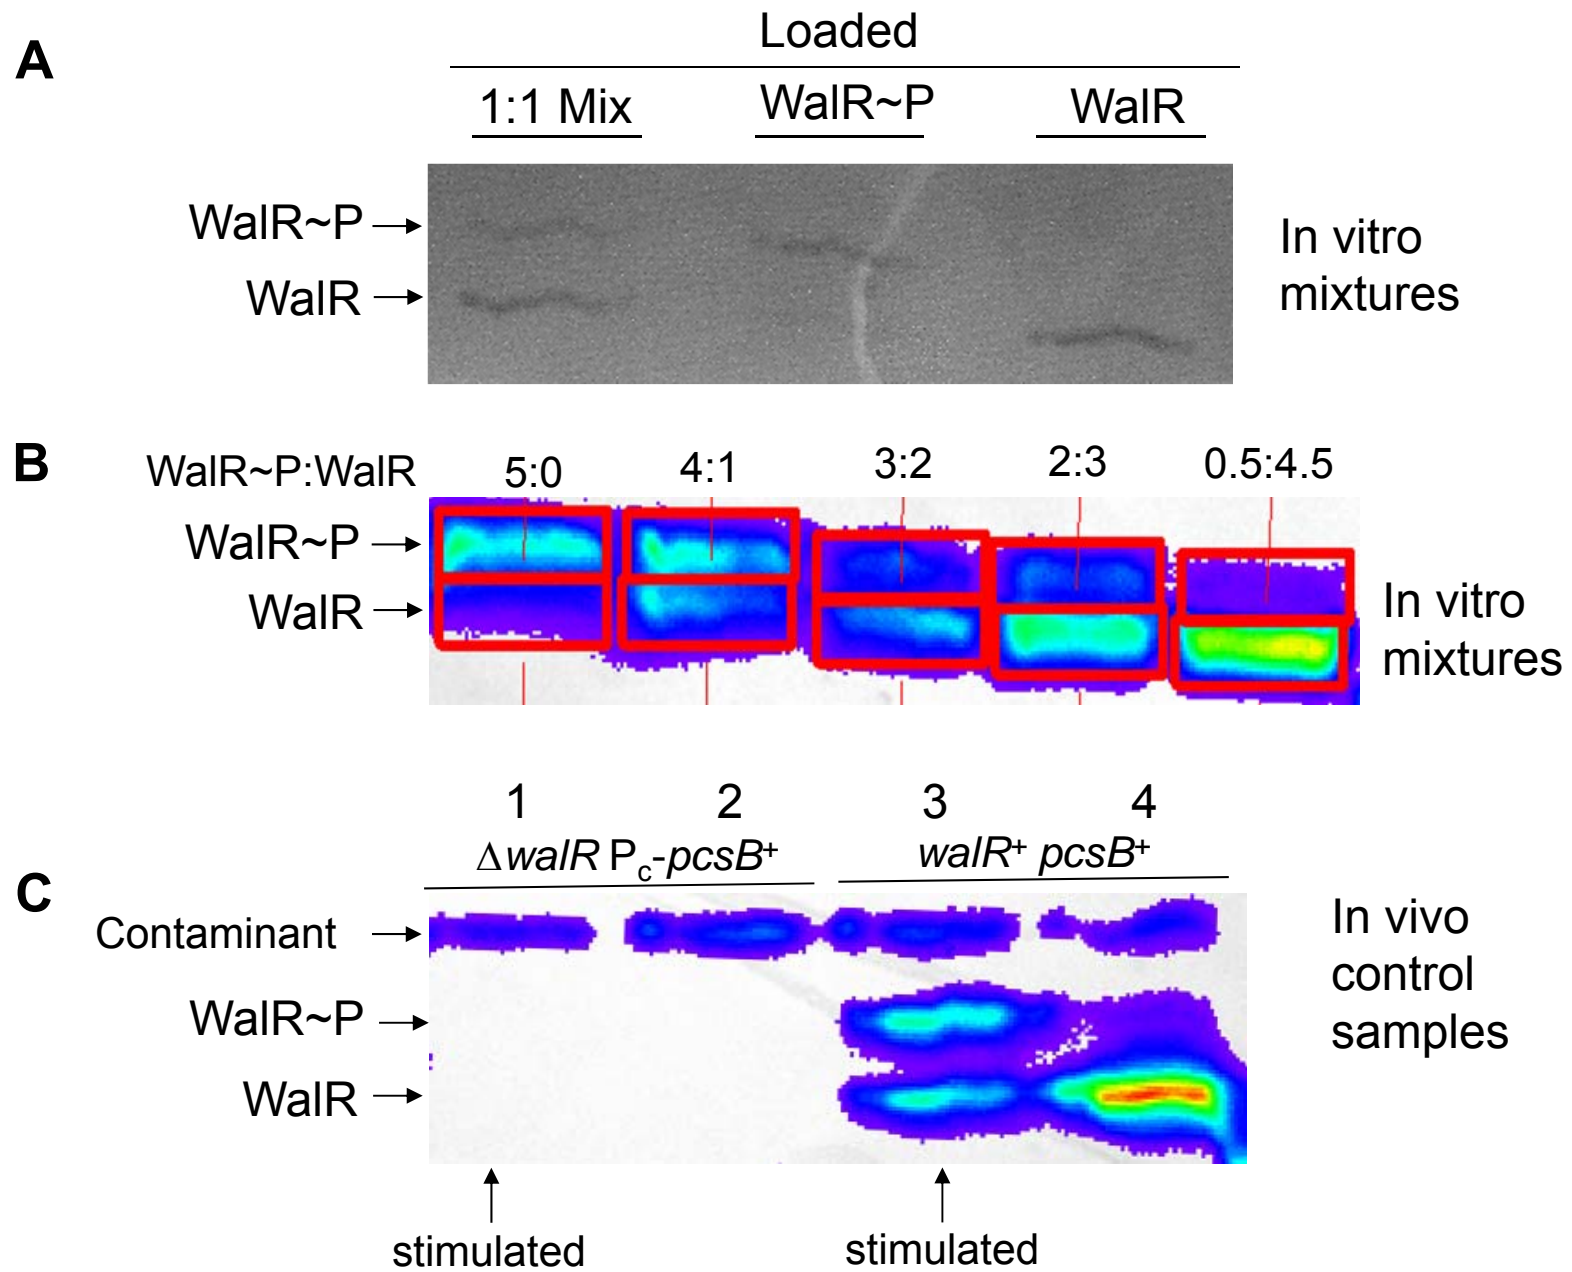

Fig. S11

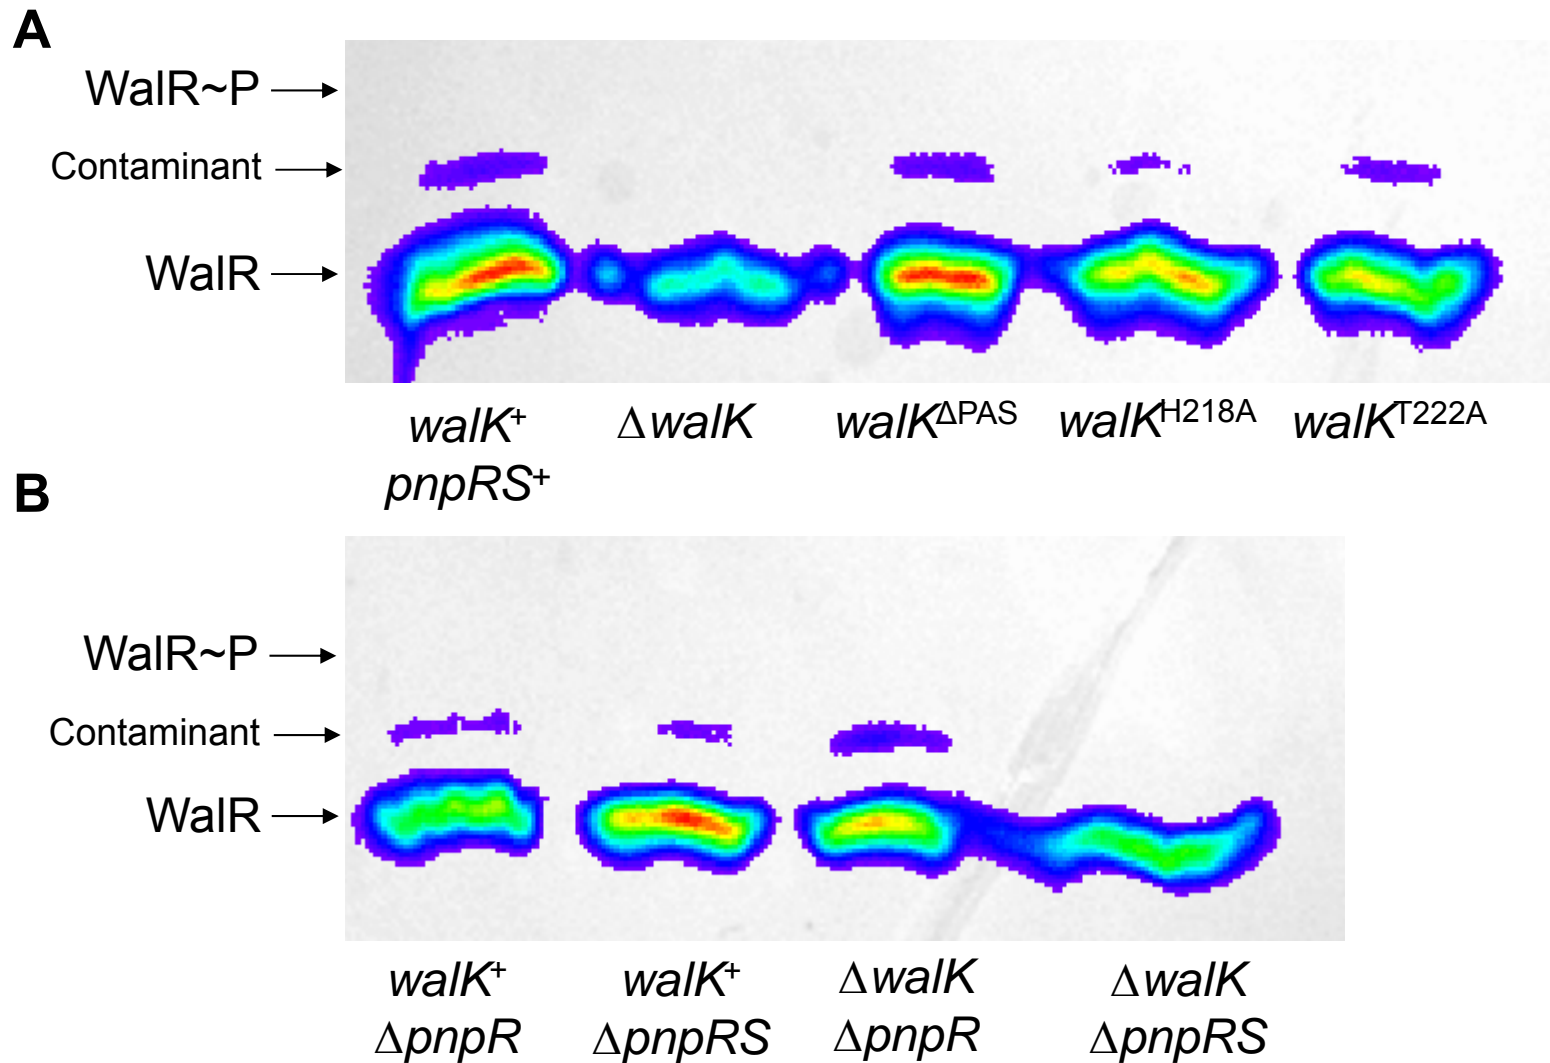

Heated controls corresponding to samples in Fig. 5; 75  $\mu$ M Phos-tag SDS-PAGE

Fig. S12



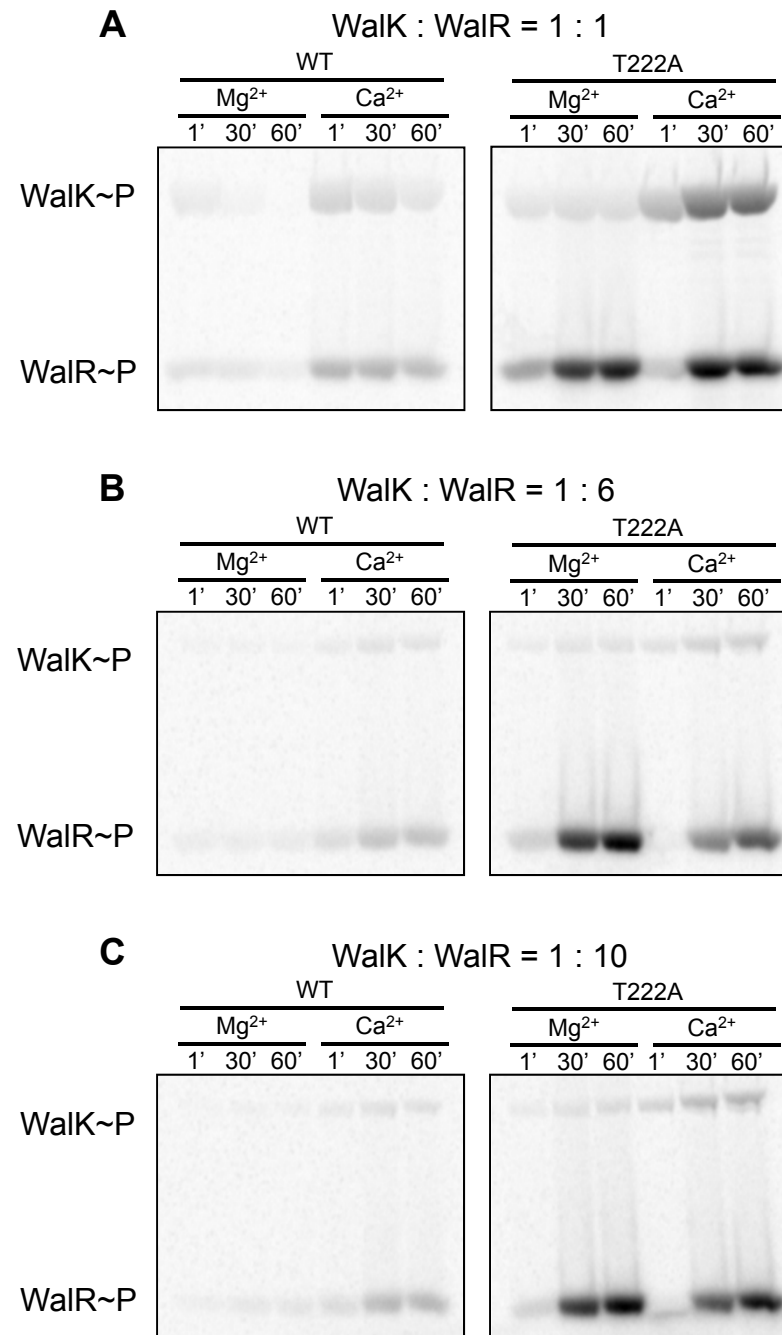

Fig. S13

|           | -4 |   |   |   | ~P |   |   | 3 |   |   |   |   |   |   |   |   |   | 14 | ~P transfer to WalR |     |
|-----------|----|---|---|---|----|---|---|---|---|---|---|---|---|---|---|---|---|----|---------------------|-----|
| HK02 WalK | S  | N | V | S | H  | E | L | R | T | P | L | T | S | V | K | S | Y | L  | E                   | +++ |
| HK04 PnpS | S  | N | A | S | H  | E | L | R | T | P | V | T | S | I | K | G | F | A  | E                   | +/- |
| HK06      | R  | G | A | S | H  | E | L | K | T | P | L | A | S | L | R | I | I | L  | E                   | -   |
| HK10 VncS | R  | G | A | S | H  | E | L | K | T | P | L | A | S | L | K | I | L | I  | E                   | -   |
| HK05 CiaH | E  | N | A | S | H  | E | L | R | T | P | L | A | V | L | Q | N | R | L  | E                   | +/- |
| HK08      | A  | Q | L | S | H  | D | I | K | T | P | I | T | S | I | Q | A | T | V  | E                   | +/- |

**Amino acids that contact WalR**

**Same amino acid**

**Similar amino acid**

**Different amino acid**

Fig. S14

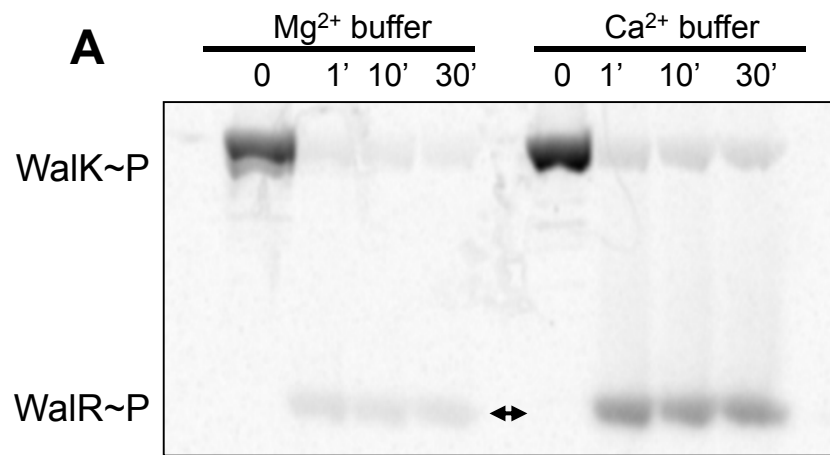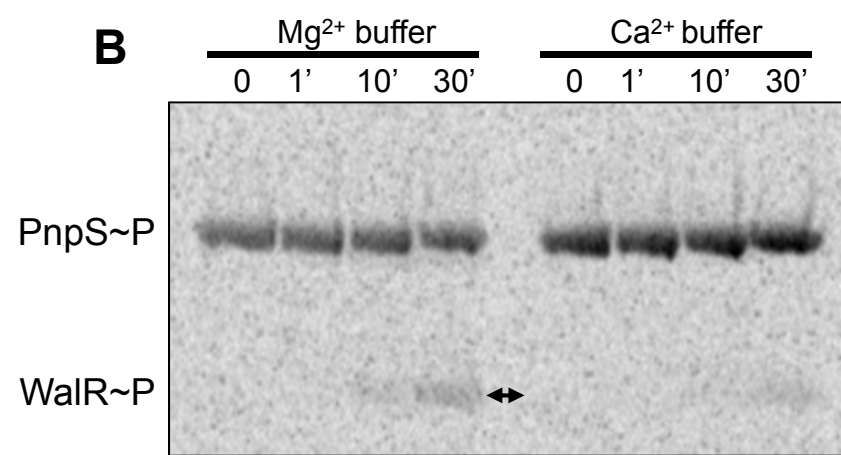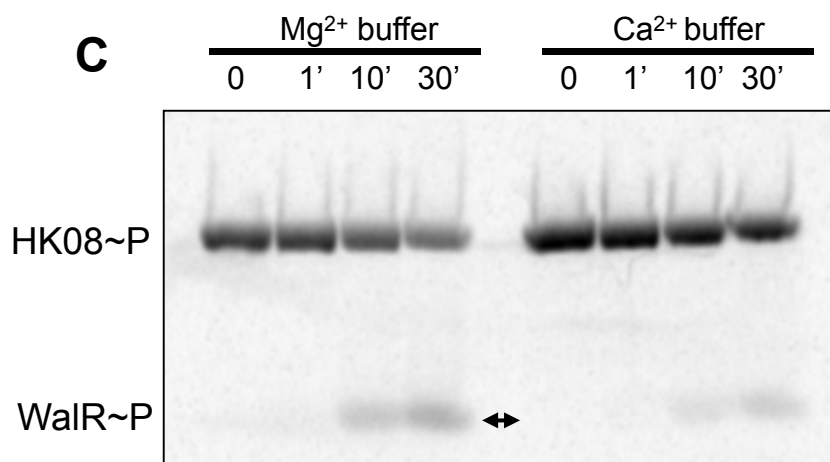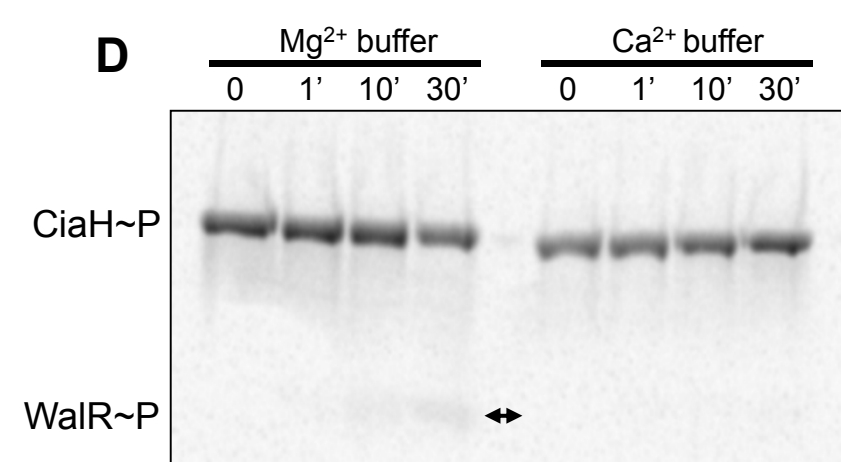

Fig. S15

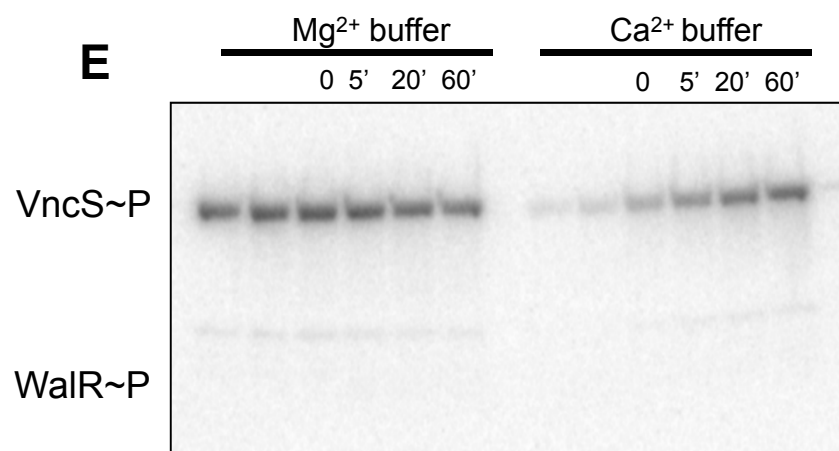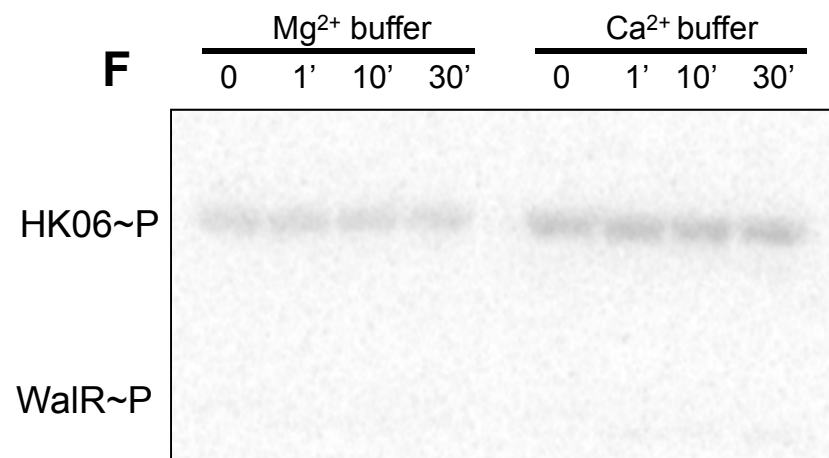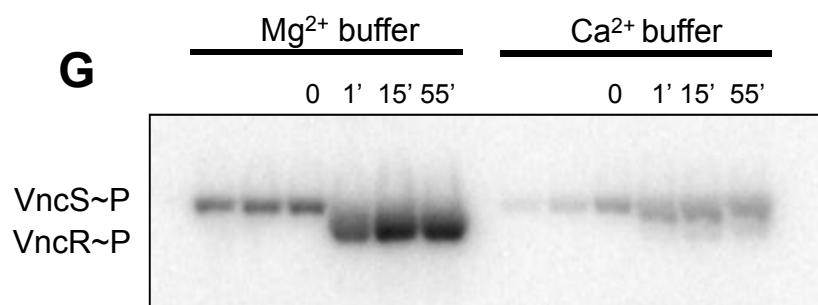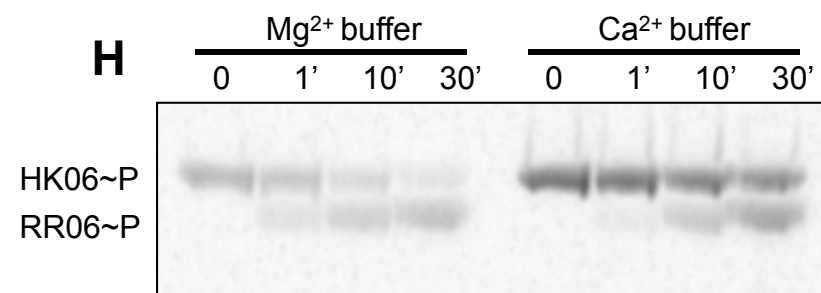

Fig. S15 (continued)

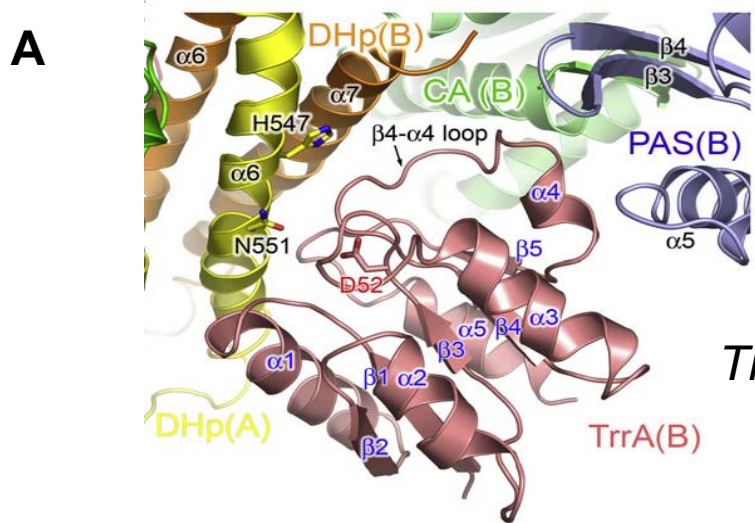

From Yamada, S., *et al.*,  
*Cell Structure* **17**:1333-1344,  
 2009.

*Thermotoga maritima*

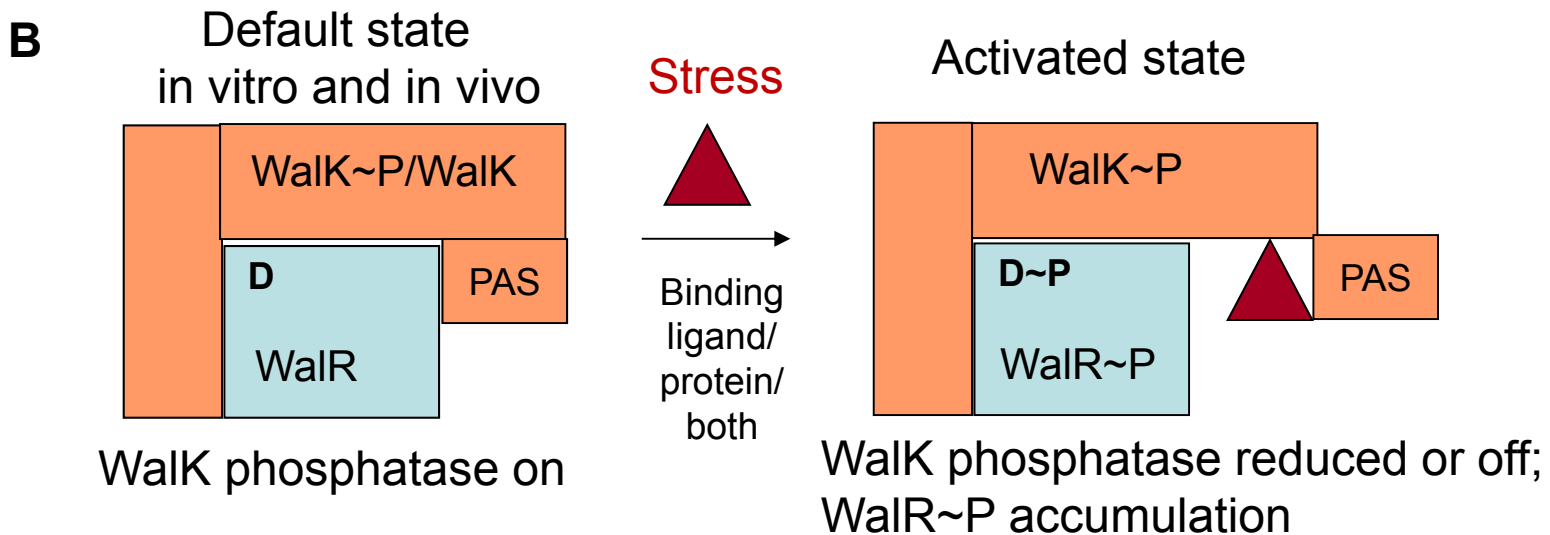

Fig. S16
